# Supplementary material for: Halogen-, oxidant- and directing group-free synthesis of donor–acceptor type conjugated polymers
Source: Royal Society of Chemistry journal article supplement (doi:10.1039/d3cc04501c), 2023-01-01
Supplement: d3cc04501c2.pdf [file d3cc04501c2.pdf]

Electronic supplementary information:

**Halogen-, oxidant- and directing group-free  
synthesis of donor–acceptor type conjugated  
polymers**

Sayori Kiyota, and Masafumi Hirano\*

Department of Applied Chemistry, Graduate School of Engineering, Tokyo University of Agriculture and Technology, 2-24-16 Nakacho, Koganei, Tokyo 184-8588, Japan.

Emails: [sayo@cc.tuat.ac.jp](mailto:sayo@cc.tuat.ac.jp) (SK); [hrc@cc.tuat.ac.jp](mailto:hrc@cc.tuat.ac.jp) (MH)

## ■Table of Contents

---

|                                                                                                                            |          |
|----------------------------------------------------------------------------------------------------------------------------|----------|
| 1. General procedures                                                                                                      | S-5      |
| 2. Reaction of 2,5-di(tetradec-1-yn-1-yl)thiophene ( <b>2a</b> ) with 2,5-di(buta-1,3-dien-1-yl)pyridine ( <b>3a</b> )     | S-5      |
| 3. Reaction of 2,5-di(oct-1-yn-1-yl)thiophene ( <b>2b</b> ) with 2,5-di(buta-1,3-dien-1-yl)pyridine ( <b>3a</b> )          | S-6      |
| 4. Reaction of 2,5-di(hex-1-yn-1-yl)thiophene ( <b>2c</b> ) with 2,5-di(buta-1,3-dien-1-yl)pyridine ( <b>3a</b> )          | S-7      |
| 5. Reaction of 2,5-di(oct-1-yn-1-yl)-3-methylthiophene ( <b>2d</b> ) with 2,5-di(buta-1,3-dien-1-yl)pyridine ( <b>3a</b> ) | S-8      |
| 6. Reaction of 1,4-di(tetradec-1-yn-1-yl)benzene ( <b>2e</b> ) with 2,5-di(buta-1,3-dien-1-yl)pyridine ( <b>3a</b> )       | S-8      |
| 7. Reaction of 2,5-di(tetradec-1-yn-1-yl)thiophene ( <b>2a</b> ) with 2,6-di(buta-1,3-dien-1-yl)pyridine ( <b>3b</b> )     | S-9      |
| 8. Reaction of 2,5-di(oct-1-yn-1-yl)thiophene ( <b>2b</b> ) with 2,6-di(buta-1,3-dien-1-yl)pyridine ( <b>3b</b> )          | S-10     |
| 9. Reaction of 2,5-di(oct-1-yn-1-yl)-3-methylthiophene ( <b>2d</b> ) with 2,6-di(buta-1,3-dien-1-yl)pyridine ( <b>3b</b> ) | S-10     |
| 10. Reaction of 1,4-di(tetradec-1-yn-1-yl)benzene ( <b>2e</b> ) with 2,6-di(buta-1,3-dien-1-yl)pyridine ( <b>3b</b> )      | S-11     |
| 11. Reaction of <b>1a</b> with <b>3a</b> in the presence of MeCN                                                           | S-11     |
| 12. Reaction of 2,5-di(oct-1-yn-1-yl)thiophene ( <b>2b</b> ) with 2,6-di(buta-1,3-dien-1-yl)pyridine ( <b>3b</b> )         | S-12     |
| 13. Reaction of 2,5-di(hex-1-yn-1-yl)thiophene ( <b>2c</b> ) with 2,5-di(buta-1,3-dien-1-yl)pyridine ( <b>3a</b> )         | S-13     |
| 14. Reaction of <b>1b</b> with <b>3b</b> in the presence of MeCN                                                           | S-13     |
| 15. UV-Vis measurements                                                                                                    | S-13     |
| 16. Fluorescence measurements                                                                                              | S-13     |
| 17. Cyclic voltammetry                                                                                                     | S-14     |
| 18. MALDI-TOF MS                                                                                                           | S-15     |
| 19. GPC measurements                                                                                                       | □ □ S-15 |
| 20. References                                                                                                             | S-15     |
| <b>Figure S1.</b> <sup>1</sup> H NMR Spectrum of <b>4aa</b> in thf-d <sub>8</sub>                                          | S-16     |
| <b>Figure S2.</b> <sup>1</sup> H NMR Spectrum (5.1-5.5 ppm) of <b>3a</b> in thf-d <sub>8</sub>                             | S-17     |
| <b>Figure S3.</b> <sup>13</sup> C{ <sup>1</sup> H} NMR Spectrum of <b>4aa</b> in thf-d <sub>8</sub>                        | S-17     |
| <b>Figure S4.</b> <sup>1</sup> H- <sup>1</sup> H COSY NMR Spectrum of <b>4aa</b> in thf-d <sub>8</sub>                     | S-18     |
| <b>Figure S5.</b> MALDI-TOF MS of <b>4aa</b>                                                                               | S-18     |
| <b>Figure S6.</b> GPC Measurements of <b>4aa</b>                                                                           | S-19     |
| <b>Figure S7.</b> <sup>1</sup> H NMR Spectrum of <b>4ba</b> in thf-d <sub>8</sub>                                          | S-20     |

|                                                                                                                    |      |
|--------------------------------------------------------------------------------------------------------------------|------|
| <b>Figure S8.</b> $^1\text{H}$ - $^1\text{H}$ COSY NMR Spectrum of <b>4ba</b> in thf- $d_8$                        | S-20 |
| <b>Figure S9.</b> $^{13}\text{C}\{^1\text{H}\}$ NMR Spectrum of <b>4ba</b> in thf- $d_8$                           | S-21 |
| <b>Figure S10.</b> $^{13}\text{C}$ - $^1\text{H}$ Correlation spectrum (HMQC) Spectrum of <b>4ba</b> in thf- $d_8$ | S-21 |
| <b>Figure S11.</b> $^1\text{H}$ - $^1\text{H}$ COSY NMR (HMBC) Spectrum of <b>4ba</b> in thf- $d_8$                | S-22 |
| <b>Figure S12.</b> MALDI-TOF MS of <b>4ba</b>                                                                      | S-22 |
| <b>Figure S13.</b> $^1\text{H}$ NMR Spectrum of <b>4ca</b> in thf- $d_8$                                           | S-23 |
| <b>Figure S14.</b> $^1\text{H}$ - $^1\text{H}$ COSY NMR Spectrum of <b>4ca</b> in thf- $d_8$                       | S-23 |
| <b>Figure S15.</b> $^{13}\text{C}\{^1\text{H}\}$ NMR Spectrum of <b>4ca</b> in thf- $d_8$                          | S-24 |
| <b>Figure S16.</b> $^{13}\text{C}$ - $^1\text{H}$ Correlation Spectrum of <b>4ca</b> in thf- $d_8$ (HMQC)          | S-24 |
| <b>Figure S17.</b> MALDI-TOF MS of <b>4ca</b>                                                                      | S-25 |
| <b>Figure S18.</b> $^1\text{H}$ NMR Spectrum of <b>4da</b> in thf- $d_8$                                           | S-26 |
| <b>Figure S19.</b> $^1\text{H}$ - $^1\text{H}$ COSY NMR Spectrum of <b>4da</b> in thf- $d_8$                       | S-26 |
| <b>Figure S20.</b> $^{13}\text{C}\{^1\text{H}\}$ NMR Spectrum of <b>4da</b> in thf- $d_8$                          | S-27 |
| <b>Figure S21.</b> MALDI-TOF MS of <b>4da</b>                                                                      | S-27 |
| <b>Figure S22.</b> $^1\text{H}$ NMR Spectrum of <b>4ea</b> in thf- $d_8$                                           | S-28 |
| <b>Figure S23.</b> $^1\text{H}$ - $^1\text{H}$ COSY NMR Spectrum of <b>4ea</b> in thf- $d_8$                       | S-28 |
| <b>Figure S24.</b> $^1\text{H}$ - $^1\text{H}$ NOESY NMR Spectrum of <b>4ea</b> in thf- $d_8$                      | S-29 |
| <b>Figure S25.</b> $^{13}\text{C}$ - $^1\text{H}$ Correlation Spectrum of <b>4ea</b> in thf- $d_8$ (HMQC)          | S-29 |
| <b>Figure S26.</b> $^{13}\text{C}\{^1\text{H}\}$ NMR Spectrum of <b>4ea</b> in thf- $d_8$                          | S-30 |
| <b>Figure S27.</b> MALDI-TOF MS of <b>4ea</b>                                                                      | S-30 |
| <b>Figure S28.</b> $^1\text{H}$ NMR Spectrum of <b>4ab</b> in thf- $d_8$                                           | S-31 |
| <b>Figure S29.</b> $^{13}\text{C}\{^1\text{H}\}$ NMR Spectrum of <b>4ab</b> in thf- $d_8$                          | S-31 |
| <b>Figure S30.</b> $^{13}\text{C}$ - $^1\text{H}$ Correlation Spectrum of <b>4ab</b> in thf- $d_8$ (HMQC)          | S-32 |
| <b>Figure S31.</b> MALDI-TOF MS of <b>4ab</b>                                                                      | S-32 |
| <b>Figure S32.</b> GPC Measurements of <b>4ab</b>                                                                  | S-33 |
| <b>Figure S33.</b> $^1\text{H}$ NMR Spectrum of <b>4bb</b> in thf- $d_8$                                           | S-34 |
| <b>Figure S34.</b> $^1\text{H}$ - $^1\text{H}$ COSY NMR Spectrum of <b>4bb</b> in thf- $d_8$                       | S-34 |
| <b>Figure S35.</b> $^1\text{H}$ - $^1\text{H}$ NOESY NMR Spectrum of <b>4bb</b> in thf- $d_8$                      | S-35 |
| <b>Figure S36.</b> $^{13}\text{C}\{^1\text{H}\}$ NMR Spectrum of <b>4bb</b> in thf- $d_8$                          | S-35 |
| <b>Figure S37.</b> $^{13}\text{C}$ - $^1\text{H}$ Correlation Spectrum of <b>4bb</b> in thf- $d_8$ (HMQC)          | S-36 |
| <b>Figure S38.</b> $^{13}\text{C}$ - $^1\text{H}$ Correlation Spectrum of <b>4bb</b> (HMBC)                        | S-36 |
| <b>Figure S39.</b> MALDI-TOF MS of <b>4bb</b>                                                                      | S-37 |
| <b>Figure S40.</b> $^1\text{H}$ NMR Spectrum of <b>4db</b> in thf- $d_8$                                           | S-37 |
| <b>Figure S41.</b> $^1\text{H}$ - $^1\text{H}$ COSY NMR Spectrum of <b>4db</b> in thf- $d_8$                       | S-38 |
| <b>Figure S42.</b> $^{13}\text{C}\{^1\text{H}\}$ NMR Spectrum of <b>4db</b> in thf- $d_8$                          | S-38 |
| <b>Figure S43.</b> $^{13}\text{C}$ - $^1\text{H}$ Correlation Spectrum of <b>4db</b> in thf- $d_8$ (HMQC)          | S-39 |

|                                                                                                                                             |      |
|---------------------------------------------------------------------------------------------------------------------------------------------|------|
| <b>Figure S44.</b> MALDI-TOF MS of <b>4db</b>                                                                                               | S-39 |
| <b>Figure S45.</b> $^1\text{H}$ NMR Spectrum of <b>4eb</b> in $\text{thf-d}_8$                                                              | S-40 |
| <b>Figure S46.</b> $^{13}\text{C}\{^1\text{H}\}$ NMR Spectrum of <b>4eb</b> in $\text{thf-d}_8$                                             | S-40 |
| <b>Figure S47.</b> MALDI-TOF MS of <b>4eb</b>                                                                                               | S-41 |
| <b>Figure S48.</b> $^1\text{H}$ NMR Spectrum of reaction between <b>3a</b> and <b>1a</b> in $\text{C}_6\text{D}_6$                          | S-41 |
| <b>Figure S49.</b> $^1\text{H}$ - $^1\text{H}$ COSY NMR Spectrum of reaction between <b>3a</b> and <b>1a</b> in $\text{C}_6\text{D}_6$      | S-42 |
| <b>Figure S50.</b> $^1\text{H}$ - $^1\text{H}$ NOESY NMR Spectrum of reaction between <b>3a</b> and <b>1a</b> in $\text{C}_6\text{D}_6$ □□□ | S-42 |

## 1. General procedures

All procedures described in this paper were performed under a nitrogen or argon atmosphere by use of Schlenk, glovebox and vacuum line techniques or a personal organic synthesiser (EYELA ChemStation PPM-5512). Benzene and tetrahydrofuran (thf) were dried and purified using the Nikko-Hansen Glass Contour Ultimate Solvent System. MeCN was dried over Drierite and distilled under nitrogen. Benzene- $d_6$  and thf- $d_8$  were dried over sodium wire and stored under vacuum, and it was directly transferred into an NMR tube or a 25 ml Schlenk tube by vacuum distillation prior to use.  $[\text{Ru}(\eta^6\text{-naphthalene})(\eta^4\text{-1,5-cod})]$  (**1a**: cod = cyclooctadiene),<sup>1</sup>  $[\text{Ru}(\eta^6\text{-naphthalene})(\eta^4\text{-oxa-bnd})]$  (**1b**: oxa-bnd = 9-oxabicyclo[3.3.1]nona-2,6-diene),<sup>2</sup> 2,5-dialkynylthiophenes (**2a-c**),<sup>3</sup> 2,5-dialkynyl-3-methylthiophene (**2d**),<sup>3</sup> 1,4-di(tetradec-1-yn-1-yl)benzene (**2e**)<sup>3</sup> and 2,5- and 2,6-di(buta-1,3-dien-1-yl)pyridines (**3a-b**)<sup>4</sup> were prepared according to the literature procedures. Other reagents were purchased from commercial suppliers and were used as received.  $^1\text{H}$ ,  $^{13}\text{C}\{^1\text{H}\}$ , and 2-dimensional NMR spectra were measured on a JEOL ECX-400P spectrometer (400 MHz for  $^1\text{H}$ ). MALDI-TOF MS were performed on Bruker Daltonics autoflex III smartbeam or Bruker Ultraflex extreme-TK2. UV-Vis analyses were performed on a JASCO V-650 spectrophotometer. The fluorescence analyses were performed on a JASCO FP-6500 fluorescence spectrophotometer. The CV analyses were performed on a TOHO polarisation unit PS-07. **The GPC analyses were performed on a TOSOH HLC-8320 GPC using tetrahydrofuran as an eluent monitored by refractive index detector.**

## 2. Reaction of 2,5-di(tetradec-1-yn-1-yl)thiophene (**2a**) with 2,5-di(buta-1,3-dien-1-yl)pyridine (**3a**)

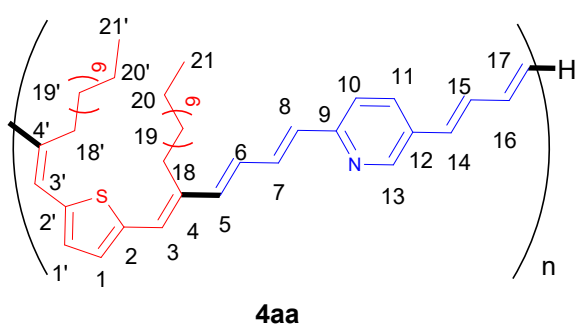

**2a** (70.0 mg, 0.149 mmol) and **3a** (27.4 mg, 0.150 mmol) in thf (1.8 ml) were added to a test tube under a nitrogen atmosphere. To the solution was added  $[\text{Ru}(\eta^6\text{-naphthalene})(\eta^4\text{-oxa-bnd})]$  (**1b**) (5.2 mg, 0.015 mmol; 10 mol%) as a catalyst. The test tube was capped with a silicone septum and the mixture was allowed to react at 30 °C for 3 d using a personal organic synthesiser. The reaction mixture was then concentrated and purified by reprecipitation with methanol to obtain a purple powder (72.2 mg) in 74% yield. This product was soluble to thf and was characterised by  $^1\text{H}$  NMR (Fig. S1)  $^1\text{H}$ - $^1\text{H}$

COSY experiment (Fig. S3),  $^{13}\text{C}\{^1\text{H}\}$  NMR (Fig. S4) and MALDI-TOF MS (Fig. S5). The dominant product was characterised as **4aa** but small amount of isomer **4aa'** was observed in the  $^1\text{H}$  NMR (**4aa/4aa'** = 8/1). Although the detailed structure of **4aa'** is less clear, we tentatively characterised as a regioisomer based on the unsymmetric **3a**.  $^1\text{H}$  NMR showed no traces of Ru complexes such as diene complex and cyclooctadienyl complex, but no further analysis of Ru contamination was carried out.

In the  $^1\text{H}$  NMR spectrum, very small amount of resonances assignable to the terminal protons have been observed (Fig. S1-2). For comparison, a  $^1\text{H}$  NMR spectrum of the same region of **3a** is shown in Fig. S2. In Fig. S1-2, the terminal proton at 2-butadienyl group has almost disappeared and only the terminal protons at 5-butadienyl group were observed at 5.16 and 5.35 ppm. This polymer has the mass number of multiple of repeating units (MS = 652.08) with the pyridyl end (MS = 182.25) by MALDI-TOF MS spectroscopy (Fig. S5). From this fact, we have considered the terminal chain end group of polymer **4a** is the 5-butadienyl group on pyridyl ring.

**4aa**:  $^1\text{H}$  NMR (400 MHz, thf- $d_8$ , r.t.):  $\delta$  0.80-1.00 (br.m, 6H, 21- and 21'- $\text{CH}_3$ ), 1.20-1.68 (br.m, 40H, 19- and 19'- $\text{CH}_2$ , 20- and 20'- $\text{CH}_2$ , overlapped with thf), 2.40-2.80 (br.m, 4H, 18- and 18'- $\text{CH}_2$ , overlapped with contaminated  $\text{H}_2\text{O}$ ), 5.16 (d,  $^3J_{\text{H-H}} = 8$  Hz, trace amount, terminal 17- $\text{CH}_2$ ), 5.35 (d,  $^3J_{\text{H-H}} = 16$  Hz, trace amount, terminal 17- $\text{CH}_2$ ), 6.45-6.80 (m, 8H, 3-, 3'-, 5-, 6-, 8-, 14-, 16- and 17- $\text{CH}$ ), 6.98-7.14 (m, 1H, 15- $\text{CH}$  overlapped with 1- and 1'- $\text{CH}$ ), 7.04 (br.s, 2H, 1- and 1'- $\text{CH}$ , overlapped with 15- $\text{CH}$ ), 7.25 (br.d,  $^3J_{\text{H-H}} = 7$  Hz, 1H, 10- $\text{CH}$ ), 7.42-7.55 (m, 1H, 7- $\text{CH}$ ), 7.74 (br.d,  $^3J_{\text{H-H}} = 7$  Hz, 1H, 11- $\text{CH}$ ), 8.55 (br.s, 1H, 13- $\text{CH}$ ).

**4aa'**:  $^1\text{H}$  NMR (400 MHz, thf- $d_8$ , r.t.):  $\delta$  0.80-1.00 (br.m, 6H,  $\text{CH}_3$ , overlapped with **4aa**), 1.20-1.68 (br.m, 40H,  $\text{CH}_2$  overlapped with thf and **4aa**), 2.40-2.80 (br.m, 4H,  $\text{CH}_2$ , overlapped with contaminated  $\text{H}_2\text{O}$  and **4aa**), 6.45-6.80 (m, 8H,  $=\text{CH}$ , overlapped with **4aa**), 6.90-7.05 (m, 3H,  $=\text{CH}$  and thienyl ring protons overlapped with **4aa**), 7.14-7.20 (1H, pyridyl ring proton), 7.35-7.48 (m, 1H,  $=\text{CH}$ ), 7.66-7.72 (1H, pyridyl ring proton overlapped with **4aa**), 8.49 (br.s, 1H, pyridyl ring proton).

$^{13}\text{C}\{^1\text{H}\}$  NMR (100 MHz, thf- $d_8$ , r.t.):  $\delta$  14.3, 20.1, 23.4, 30.2, 30.5, 32.7, 120.2, 122.32, 129.1, 129.2, 129.5, 130.0, 130.2, 131.7, 132.2, 132.7, 138.9, 139.8, 139.9, 140.0, 140.2, 140.3, 140.4, 141.5, 142.36, 142.42, 149.3, 155.1.

MALDI-TOF MS  $m/z = 8006.785$  ( $n = 12$ ).

### 3. Reaction of 2,5-di(oct-1-yn-1-yl)thiophene (**2b**) with 2,5-di(hexyl-1,3-dien-1-yl)pyridine (**3a**)

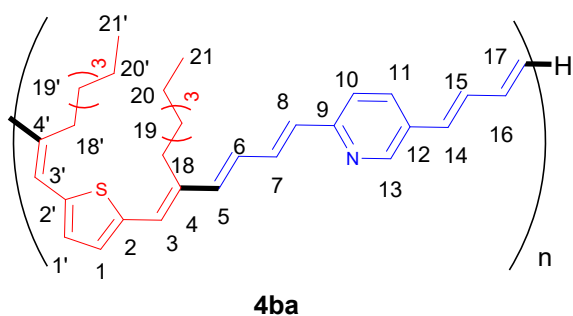

**2b** (19.0 mg, 0.0609 mmol) and **3a** (11.0 mg, 0.601 mmol) in thf (0.5 ml) were added to a test tube under a nitrogen atmosphere. To the solution was added **1b** (2.5 mg, 0.071 mmol; 12 mol%). The mixture was allowed to react at 30 °C for 3 d. The reaction mixture was concentrated and purified by reprecipitation with methanol to obtain a red solid of **4ba** (14.9 mg) in 51% yield. This product was characterised by NMR and MALDI-TOF MS.

$^1\text{H}$  NMR (400 MHz, thf- $d_8$ , r.t.):  $\delta$  0.90-1.00 (m, 6H, 21- and 21'- $\text{CH}_3$ ), 1.25-1.65 (br.m, 16H, 19-, 19'-, 20- and 20'- $\text{CH}_2$ , overlapped with thf), 2.42-2.80 (m, 4H, 18- and 18'- $\text{CH}_2$ , overlapped with  $\text{H}_2\text{O}$ ), 5.17 (d,  $^3J_{\text{H-H}} = 10$  Hz, trace amount, terminal 17- $\text{CH}_2$ ), 5.22 (d,  $^3J_{\text{H-H}} = 10$  Hz, trace amount, regioisomer, terminal proton of 2-butadienyl proton), 5.35 (d,  $^3J_{\text{H-H}} = 17$  Hz, trace amount, terminal 17- $\text{CH}_2$ ), 5.41 (d,  $^3J_{\text{H-H}} = 17$  Hz, trace amount, regioisomer, terminal proton of 2-butadienyl proton), 6.30-6.80 (m, 4H, 3-, 3'-, 5- and 17- $\text{CH}$ , overlapped with 6-, 8-, 14- and 16- $\text{CH}$ ), 6.50-6.60 (m, 2H, 6- and 16- $\text{CH}$ , overlapped with 8- or 14- $\text{CH}$ ), 6.63 (d,  $J_{\text{H-H}} = 15.6$  Hz, 1H, 8- or 14- $\text{CH}$ , overlapped with 6- and 16- $\text{CH}$ ), 6.67 (d,  $J_{\text{H-H}} = 15.4$  Hz, 1H, 14- or 8- $\text{CH}$ , overlapped with 8- or 14- $\text{CH}$ ), 7.00-7.45 (2H, 1- and 1'- $\text{CH}$ , overlapped with 15- $\text{CH}$ ), (7.08, dd,  $^3J_{\text{H-H}} = 16, 10$  Hz, 1H, 15- $\text{CH}$ , overlapped with 1- and 1'- $\text{CH}$ ), 7.26 (br.d,  $^3J_{\text{H-H}} = 9$  Hz, 1H, 10- $\text{CH}$ ), 7.48 (dd,  $^3J_{\text{H-H}} = 15, 9$  Hz 1H, 7- $\text{CH}$ ), 7.74 (br.d,  $^3J_{\text{H-H}} = 9$  Hz, 1H, 11- $\text{CH}$ ), 8.55 (br.s, 1H, 13- $\text{CH}$ ).

$^{13}\text{C}\{^1\text{H}\}$  NMR (100 MHz, thf- $d_8$ , r.t.):  $\delta$  14.4, 20.1, 23.3, 23.5, 29.4, 30.8, 32.2, 32.5, 32.7, 118.2 (terminal 17- $\text{CH}$ ), 122.3, 125.4, 125.7, 126.1, 126.5, 129.2, 129.4, 129.5, 130.1, 131.5, 132.2, 132.7, 134.1, 134.2, 138.1, 138.9, 139.9, 140.2, 141.5, 142.4, 149.3, 155.2, 155.7.

MALDI-TOF MS  $m/z = 2231.967$  ( $n = 4$ ).

#### 4. Reaction of 2,5-di(hex-1-yn-1-yl)thiophene (**2c**) with 2,5-di(buta-1,3-dien-1-yl)pyridine (**3a**)

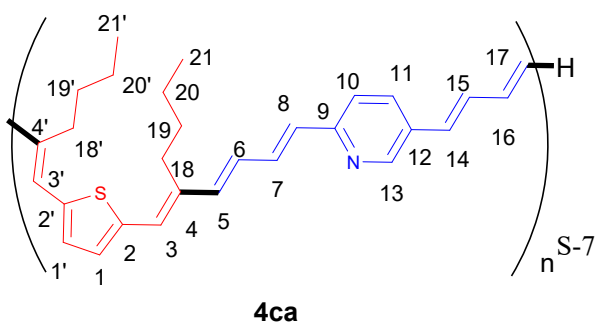

**4ca**: reddish brown solid. 47% yield.

$^1\text{H}$  NMR (400 MHz, thf- $d_8$ , r.t.):  $\delta$  0.95 (t,  $^3J_{\text{H-H}} = 7$  Hz, chain end protons assignable to terminal 21'- $\text{CH}_3$ ), 0.97-1.08 (br.s, 6H, 21- and 21'- $\text{CH}_3$ ), 1.50-1.70 (br.m, 8H, 19-, 19'-, 20- and 20'- $\text{CH}_2$ , overlapped with thf), 2.42-2.50 (m, 1H, 18- or 18'- $\text{CH}_2$ ), 2.60-2.80 (br.m, 3H, 18- and 18'- $\text{CH}_2$ , overlapped with  $\text{H}_2\text{O}$ ), 5.17 (d,  $^3J_{\text{H-H}} = 10$  Hz, terminal 17- $\text{CH}_2$ ), 5.35 (d,  $^3J_{\text{H-H}} = 18$  Hz, terminal 17- $\text{CH}_2$ ), 6.40-6.80 (m, 8H, 3-, 3'-, 5-, 6-, 8-, 14-, 16- and 17- $\text{CH}$ ), 6.95-7.14 (br.m, 3H, 1-, 1'- and 15- $\text{CH}$ ), 7.26 (br.d,  $^3J_{\text{H-H}} = 8$  Hz, 1H, 10- $\text{CH}$ ), 7.48 (br.dd,  $^3J_{\text{H-H}} = 16, 9$  Hz, 1H, 7- $\text{CH}$ ), 7.74 (br.d,  $^3J_{\text{H-H}} = 8$  Hz, 1H, 11- $\text{CH}$ ), 8.55 (br.s, 1H, 13- $\text{CH}$ ).

$^{13}\text{C}\{^1\text{H}\}$  NMR (100 MHz, thf- $d_8$ , r.t.):  $\delta$  14.4, 20.1, 23.3, 23.5, 29.4, 30.8, 32.2, 32.5, 32.7, 118.2 (17- $\text{CH}$ ), 122.3, 125.4, 125.7, 126.1, 126.5, 129.2, 129.4, 129.5, 130.1, 131.5, 132.2, 132.7, 134.1, 134.2, 138.1, 138.9, 139.9, 140.2, 141.5, 142.4, 149.3, 155.3.

MALDI-TOF MS  $m/z = 2379.886$  ( $n = 5$ ).

## 5. Reaction of 2,5-di(oct-1-yn-1-yl)-3-methylthiophene (2d) with 2,5-di(buta-1,3-dien-1-yl)pyridine (3a)

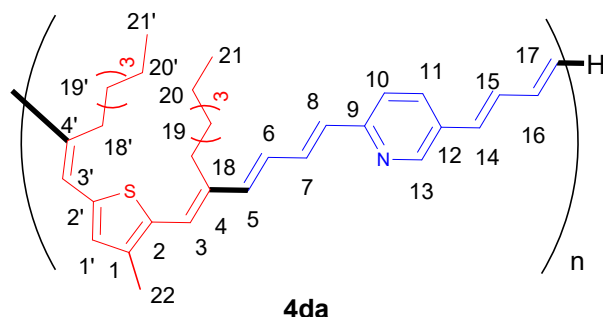

**4da**: red powder. 13% yield.

$^1\text{H}$  NMR (400 MHz, thf- $d_8$ , r.t.):  $\delta$  0.88-1.00 (br.m, 6H, 21- and 21'- $\text{CH}_3$ ), 1.25-1.65 (br.m, 16H, 19-, 19'-, 20- and 20'- $\text{CH}_2$ , overlapped with thf), 2.21 (s, 3H, 22- $\text{CH}_3$ ), 2.27 (s, minor regioisomer assignable to 22- $\text{CH}_3$ : major/minor = 4/1), 2.42-2.80 (br, 4H, 18- and 18'- $\text{CH}_2$ , overlapped with  $\text{H}_2\text{O}$ ), 5.17 (d,  $^3J_{\text{H-H}} = 10$  Hz, terminal 17- $\text{CH}_2$ ), 5.35 (d,  $^3J_{\text{H-H}} = 17$  Hz, terminal 17- $\text{CH}_2$ ), 6.40-6.80 (m, 8H, 3-, 3'-, 5-, 6-, 8-, 14-, 16- and 17- $\text{CH}$ ), 6.81 (s, 1H, 1'- $\text{CH}$ ), 6.82 (s, 1H, 1'- $\text{CH}$  of isomer), 6.90 (s, terminal 1'- $\text{CH}$ ), 6.92 (s, terminal 1'- $\text{CH}$  of isomer), 7.06 (dd,  $^3J_{\text{H-H}} = 15, 11$  Hz, 1H, 15- $\text{CH}$ , overlapped with 1'- $\text{CH}$ ), 7.24 (br.d,  $^3J_{\text{H-H}} = 8$  Hz, 1H, 10- $\text{CH}$ ), 7.45 (dd,  $^3J_{\text{H-H}} = 15, 10$  Hz, 1H, 7- $\text{CH}$ ), 7.73 (br.d,  $^3J_{\text{H-H}} = 8$  Hz, 1H, 11- $\text{CH}$ ), 8.54 (br.s, 1H, 13- $\text{CH}$ ).

$^{13}\text{C}\{^1\text{H}\}$  NMR (100 MHz, thf- $d_8$ , r.t.):  $\delta$  14.2, 14.3, 14.4, 14.5, 20.2, 23.3, 23.4, 29.3, 29.5, 30.5, 30.6, 30.1, 32.5, 32.7, 122.4, 126.0, 128.9, 129.2, 131.5, 131.6, 132.3, 132.7, 133.1, 134.0, 138.7, 139.6, 140.0, 141.8, 144.9, 149.3, 155.3. This  $^{13}\text{C}\{^1\text{H}\}$  NMR spectrum of this compound was measured twice, but it was difficult to measure the spectrum with sufficient resolution.



MALDI-TOF MS  $m/z = 5789.253$  ( $n = 11$ ).

## 6. Reaction of 1,4-di(tetradec-1-yn-1-yl)benzene (2e) with 2,5-di(buta-1,3-dien-1-yl)pyridine (3a)

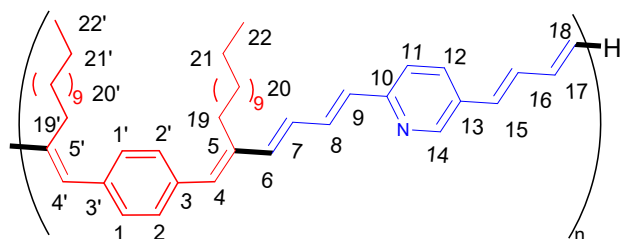

**4ea**

**4ea**, yellow brown solid. 64% yield.

$^1\text{H}$  NMR (400 MHz,  $\text{thf-d}_8$ , r.t.): 0.89 (br.t,  $^3J_{\text{H-H}} = 7$  Hz, 6H, 22- and 22'- $\text{CH}_3$ ), 1.10-1.70 (br, 40H, 20-, 20'-, 21- and 21'- $\text{CH}_2$ ), 2.30-2.70 (m, 4H, 19- and 19'- $\text{CH}_2$ , overlapped with  $\text{H}_2\text{O}$ ), 5.17 (d,  $^3J_{\text{H-H}} = 10$  Hz, terminal 18- $\text{CH}$ ), 5.37 (d,  $^3J_{\text{H-H}} = 17$  Hz, terminal 18'- $\text{CH}$ ), 6.40-6.70 (m, 6- or 9-, 7- or 8-, 15- and 7- $\text{CH}$ ), 6.56 (s, 2H, 4- and 4'- $\text{CH}$ , overlapped), 6.66 (d,  $^3J_{\text{H-H}} = 8$  Hz, 1H, 9- or 6- $\text{CH}$ ), 6.94 (dd,  $^3J_{\text{H-H}} = 16, 10$  Hz, 1H, 16- $\text{CH}$ ), 7.20-7.40 (m, 1H, 18- $\text{CH}$ , overlapped), 7.26 (d,  $^3J_{\text{H-H}} = 6$  Hz, 1H, 11- $\text{CH}$ , overlapped), 7.26 (d,  $^3J_{\text{H-H}} = 8.0$  Hz, 2H, 1- and 1' or 2- and 2'- $\text{CH}$ , overlapped), 7.33 (d,  $^3J_{\text{H-H}} = 8$  Hz, 2H, 1'- and 1 or 2'- and 2- $\text{CH}$ ), 7.46 (dd,  $^3J_{\text{H-H}} = 15, 10$  Hz, 1H, 7- or 8- $\text{CH}$ ), 7.74 (d,  $^3J_{\text{H-H}} = 6$  Hz, 1H, 12- $\text{CH}$ ), 8.55 (s, 1H, 14- $\text{CH}$ ).

$^{13}\text{C}\{^1\text{H}\}$  NMR (100 MHz,  $\text{thf-d}_8$ , r.t.): 14.3, 23.4, 29.5, 29.6, 29.7, 29.9, 30.0, 30.1, 30.4, 30.5, 30.7, 32.7, 118.1, 122.2, 129.3, 129.6, 130.1, 131.4, 131.9, 132.0, 132.3, 132.6, 133.1, 134.1, 137.7, 137.9, 138.1, 140.3, 140.5, 142.3, 149.4, 155.7.

MALDI-TOF MS  $m/z = 2576.434$ .

## 7. Reaction of 2,5-di(tetradec-1-yn-1-yl)thiophene (2a) with 2,6-di(buta-1,3-dien-1-yl)pyridine (3b)

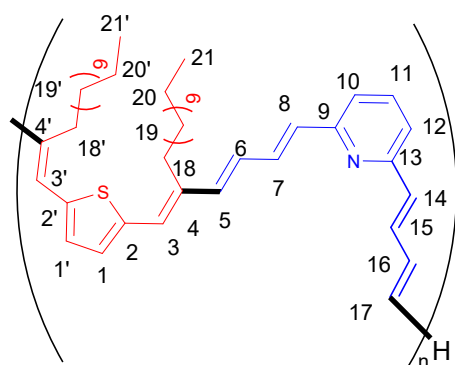

**4ab**

**4ab**: red powder. 88% yield.

$^1\text{H}$  NMR (400 MHz,  $\text{thf-d}_8$ , r.t.):  $\delta$  0.89 (br, 6H, 21- and 21'- $\text{CH}_3$ ), 1.20-1.70 (br.m, 40H, 19-, 19', 20- and 20'- $\text{CH}_2$ , overlapped), 2.40-2.50 (m, 1H, 18- or 18'- $\text{CH}_2$ , overlapped with  $\text{H}_2\text{O}$ ), 2.60-2.83 (br.m, 3H, 18- and 18'- $\text{CH}_2$ ), 5.24 (d,  $^3J_{\text{H-H}} = 11$  Hz, terminal 17- $\text{CH}_2$ ), 5.45 (d,  $^3J_{\text{H-H}} = 17$  Hz, terminal 17- $\text{CH}_2$ ), 6.55-6.90 (m, 8H, 3-, 3'-, 5-, 6-, 8-, 14-, 16- and 17- $\text{CH}$ ), 7.00-7.10 (br.s, 2H, 1- and 1'- $\text{CH}$ ), 7.10-7.20 (m, 2H, 11- and 10- or 12- $\text{CH}$ ), 7.30-7.65 (3H, 7-, 12- or 10- and 15- $\text{CH}$ ).

$^{13}\text{C}\{^1\text{H}\}$  NMR (100 MHz,  $\text{thf-d}_8$ , r.t.): 14.3, 23.4, 30.2, 30.5, 30.6, 31.1, 32.8, 120.8, 126.4, 129.1, 130.1, 132.6, 134.3, 137.1, 137.2, 137.9, 139.9, 140.3, 142.4, 156.3.

MALDI-TOF MS  $m/z = 5868.287$  ( $n = 9$ ).

## 8. Reaction of 2,5-di(oct-1-yn-1-yl)thiophene (2b) with 2,6-di(buta-1,3-dien-1-yl)pyridine (3b)

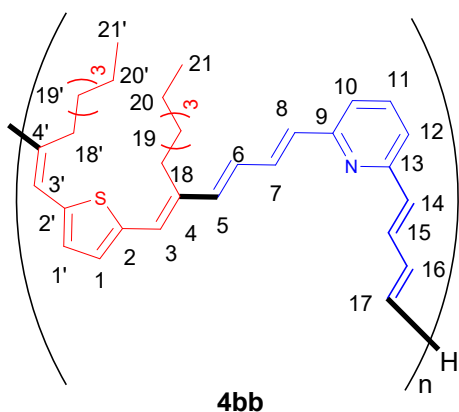

**4bb**: red solid. 33% yield.

$^1\text{H}$  NMR (400 MHz,  $\text{thf-d}_8$ , r.t.):  $\delta$  0.85-1.05 (m, 6H, 21- and 21'- $\text{CH}_3$ ), 1.20-1.70 (br.m, 16H, 19-, 19', 20- and 20'- $\text{CH}_2$ , overlapped), 2.40-2.50 (m, 2H, 18 or 18'- $\text{CH}_2$ , overlapped with  $\text{H}_2\text{O}$ ), 2.60-2.80 (br.m, 2H, 18, 18'- $\text{CH}_2$ ), 5.25 (d,  $^3J_{\text{H-H}} = 10$  Hz, terminal 17- $\text{CH}_2$ ), 5.45 (d,  $^3J_{\text{H-H}} = 16$  Hz, terminal 17- $\text{CH}_2$ ), 6.50-6.65 (m, 1H, 16- $\text{CH}$ ), 6.55-6.80 (m, 7H, 3-, 3'-, 5-, 6-, 8-, 14-, 16- and 17- $\text{CH}$ ), 6.94 (d,  $^3J_{\text{H-H}} = 4$  Hz, 1H, 1- or 1'- $\text{CH}$ ), 7.02 (d,  $^3J_{\text{H-H}} = 4$  Hz, 1H, 1'- or 1- $\text{CH}$ ), 7.04 (d, 1H,  $^3J_{\text{H-H}} = 9$  Hz, 10- or 12- $\text{CH}$ ), 7.10-7.20 (m, 1H, 11- $\text{CH}$ ), 7.50-7.65 (3H, 7-, 10- or 12-, 15- $\text{CH}$ ).

$^{13}\text{C}\{^1\text{H}\}$  NMR (100 MHz,  $\text{thf-d}_8$ , r.t.): 14.2, 14.29, 14.34, 23.3, 23.46, 23.53, 29.4, 29.5, 30.5, 30.6, 30.8, 32.2, 32.5, 32.7, 119.4, 125.5, 125.9, 126.4, 129.4, 130.1, 131.6, 132.8, 133.9, 134.1, 134.3, 137.1, 137.3, 139.9, 140.2, 141.6, 142.4, 156.3.

MALDI-TOF MS  $m/z = 2422.999$ .

## 9. Reaction of 2,5-di(oct-1-yn-1-yl)-3-methylthiophene (2d) with 2,6-di(buta-1,3-dien-1-yl)pyridine (3b)

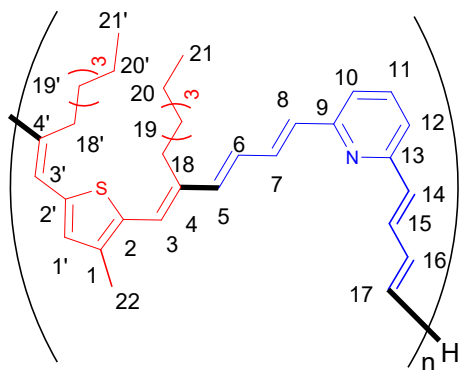

**4db**

**4db**: orange solid. 98% yield.

$^1\text{H}$  NMR (400 MHz, thf- $d_8$ , r.t.):  $\delta$  0.85-1.05 (m, 6H, 21- and 21'- $\text{CH}_3$ ), 1.20-1.70 (br.m, 16H, 19-, 19'-, 20- and 20'- $\text{CH}_2$ , overlapped), 2.20-2.24 (br.s, 1.2H, a regioisomer of 1- $\text{CH}_3$ ), 2.26-2.33 (br.s, 1.7H, a regioisomer of 1- $\text{CH}_3$ ), 2.40-2.50 (m, 1H, 18 or 18'- $\text{CH}_2$ , overlapped with  $\text{H}_2\text{O}$ ), 2.60-2.80 (br.m, 4H, 18- and 18'- $\text{CH}_2$ ), 6.50-6.85 (m, 8H, 3-, 3'-, 5-, 6-, 7-, 8-, 16- and 17- $\text{CH}$ ), 6.92 (br.s, 1H, 1'- $\text{CH}$ ), 7.05-7.15 (br.m, 2H, 11- and 14- $\text{CH}$ ), 7.45-7.65 (m, 3H, 10-, 12- and 15- $\text{CH}$ ).

$^{13}\text{C}\{^1\text{H}\}$  NMR (100 MHz, thf- $d_8$ , r.t.): 14.3, 14.4, 23.4, 23.5, 23.6, 29.3, 33.8, 32.5, 32.7, 120.8, 121.2, 126.3, 128.6, 129.0, 131.6, 132.3, 133.2, 134.4, 136.2, 137.1, 138.3, 139.1, 139.8, 140.0, 140.3, 140.7, 156.2.

MALDI-TOF MS  $m/z$  = 5972.95 ( $n = 12$ ).

## 10. Reaction of 1,4-di(tetradec-1-yn-1-yl)benzene (2e) with 2,6-di(buta-1,3-dien-1-yl)pyridine (3b)

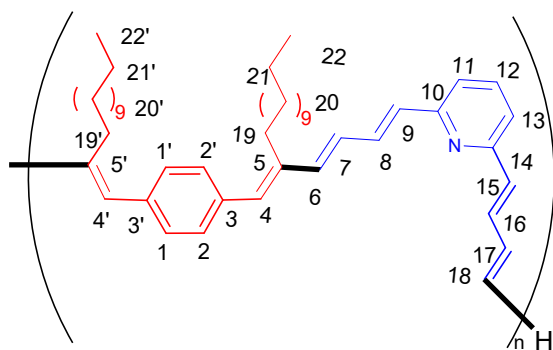

**4eb**

**4eb**: yellow brown powder. 91% yield.

$^1\text{H}$  NMR (400 MHz,  $\text{thf-d}_8$ , r.t.): 0.87 (br, 6H, 22- and 22'- $\text{CH}_3$ ), 1.10-1.70 (br, 40H, 20-, 20'-, 21- and 21'- $\text{CH}_2$ ), 2.30-2.70 (m, 4H, 19- and 19'- $\text{CH}_2$ , overlapped), 6.40-6.80 (m, 7H, 4-, 4'-, 6-, 9-, 15-, 7- or 8- or 16-, and 18- $\text{CH}$ ), 7.10-7.20 (m, 1H, 7- or 8- or 16- $\text{CH}$ ), 7.13 (br.d,  $^3J_{\text{H-H}} = 7$  Hz, 2H, 1-, 1'- or 2-, 2'- $\text{CH}$ ), 7.20-7.50 (br.m, 4H, 1-, 1'- or 2-, 2'-, 12- and 15- $\text{CH}$ ), 7.50-7.70 (br.m, 3H, 11-, 13- and 17- $\text{CH}$ ).

$^{13}\text{C}\{^1\text{H}\}$  NMR (100 MHz,  $\text{thf-d}_8$ , r.t.): 14.3, 23.4, 29.9, 30.2, 30.5, 30.8, 32.7, 120.65, 120.72, 120.8, 129.1, 129.4, 129.6, 130.2, 132.0, 132.6, 132.8, 134.2, 137.1, 140.7, 142.0, 156.3.

MALDI-TOF MS  $m/z = 5814.467$  ( $n = 9$ ).

## 11. Reaction of **1a** with **3a** in the presence of MeCN

**3a** (3.52 mg, 0.0192 mmol) in  $\text{C}_6\text{D}_6$  (600  $\mu\text{l}$ ) was added to an NMR tube under nitrogen atmosphere. To the solution was added MeCN (2.0  $\mu\text{l}$ , 0.038 mmol) by a hypodermic syringe at room temperature. Complex **1a** (6.47 mg, 0.0192 mmol) was added to the solution. The mixture was allowed to react at room temperature for 1 h, during which the reaction was monitored by  $^1\text{H}$  NMR spectroscopy. The formation of **5a** (8%), **5b** (42%) and **6a** (22%) was characterised according to our previous paper.<sup>5</sup> An acetonitrile complex coordinated 2-butadienyl group, and a complex coordinated 2-butadienyl group and pyridine were formed within 5 minutes.

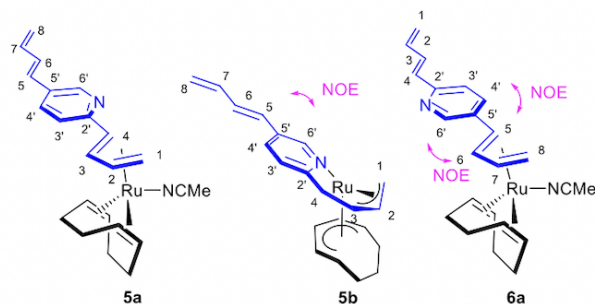

**5a**: 0.74 (d,  $^3J_{\text{H-H}} = 8.0$  Hz, 1H, 1-*endo-CH*), 0.94 (s, 3H, MeCN), 1.74 (d,  $^3J_{\text{H-H}} = 8.0$  Hz, 1H, 1-*exo-CH*). 2.40 (d,  $^3J_{\text{H-H}} = 8.0$  Hz, 1H, 4- $\text{CH}$ ), 5.04-5.15 (m, 1H, 2- $\text{CH}$ , overlapped with 8- $\text{CH}$ ), 5.15 (d,  $^3J_{\text{H-H}} = 16.8$  Hz, 1H, 8- $\text{CH}$ ), 5.15 (d,  $^3J_{\text{H-H}} = 16.8$  Hz, 1H, 8- $\text{CH}$ ), 6.24-6.35 (m, 1H, 7- $\text{CH}$ , overlapped with **5b**), 6.40-6.52 (m, 1H, 6- $\text{CH}$ , overlapped with **5b**), 6.78 (dd,  $^3J_{\text{H-H}} = 12.4, 8.0$  Hz, 1H, 3- $\text{CH}$ ), 6.81 (d,  $^3J_{\text{H-H}} = 8.0$  Hz, 1H, 3'- $\text{CH}$ ), 7.10-7.20 (1H, 4'- $\text{CH}$ , overlapped with  $\text{C}_6\text{HD}_5$ ), 8.49 (br.s, 1H, 6'- $\text{CH}$ ), and the resonances assigned to the 1,5-cod ligand were obscured in the mixture of **5b** and **6a**.  
**5b**: 0.66-0.67 (1H, 1-1-*endo-CH*, overlapped with free MeCN), 1.72 (d,  $^3J_{\text{H-H}} = 12.0$  Hz, 1H, 1-*exo-CH*), 2.86 (d,  $^3J_{\text{H-H}} = 19.2$  Hz, 1H, 4- $\text{CH}_2$ ), 3.07 (dd,  $^3J_{\text{H-H}} = 19.2, 8.0$  Hz, 1H, 4- $\text{CH}_2$ ), 4.55-4.65 (m, 1H, 3- $\text{CH}$ ), 4.90-5.05 (m, 1H, 2- $\text{CH}$ ), 4.95-5.10 (1H, 8- $\text{CH}$ , overlapped with **5a**), 5.17 (d,  $^3J_{\text{H-H}} = 16.4$  Hz, 1H, 8- $\text{CH}$ ), 6.06 (d,  $^3J_{\text{H-H}} = 16.0$  Hz, 1H, 5- $\text{CH}$ ), 6.17 (d,  $^3J_{\text{H-H}} = 7.6$  Hz, 1H, 3'- $\text{CH}$ ), 6.30 (dt,  $^3J_{\text{H-H}} = 16.8, 10.4$  Hz, 1H, 7- $\text{CH}$ ), 6.47 (dd,  $^3J_{\text{H-H}} = 14.8, 9.6$  Hz, 1H, 6- $\text{CH}$ ), 6.73 (d,  $^3J_{\text{H-H}} = 8.4$  Hz,

1H, 4'-CH), 9.42 (br.s, 1H, 6'-CH), and the resonances assigned to the cyclooctadienyl ligand were obscured in the mixture of **5b** and **6a**.

**6a**: 0.66-0.67 (1H, 8-endo-CH, overlapped with free MeCN), 0.94 (s, 3H, MeCN), 1.74 (d,  $^3J_{\text{H-H}} = 8.0$  Hz, 1H, 8-exo-CH), 2.86 (d,  $^3J_{\text{H-H}} = 19.2$  Hz, 1H, 5-CH), overlapped with **5a**, 4.90-5.05 (m, 1H, 7-CH), 5.08 (d,  $^3J_{\text{H-H}} = 8.4$  Hz, 1H, 1-CH), 5.28 (d,  $^3J_{\text{H-H}} = 16.8$  Hz, 1H, 1-CH), 6.10-6.22 (m, 1H, 6-CH, overlapped with **5a**), 6.40-6.55 (m, 1H, 2-CH), 6.73 (d,  $^3J_{\text{H-H}} = 8.4$  Hz, 1H, 3'-CH), 7.20-7.30 (1H, 4'-CH, overlapped with naphthalene), 7.56 (dd,  $^3J_{\text{H-H}} = 15.6, 11.2$  Hz, 1H, 3-CH), 8.44 (br.s, 1H, 6'-CH), and the resonances assigned to the 1,5-cod ligand were obscured in the mixture of **5b** and **6a**.

## 12. Reaction of 2,5-di(oct-1-yn-1-yl)thiophene (**2b**) with 2,6-di(buta-1,3-dien-1-yl)pyridine (**3b**)

This experiment was conducted to check whether the reaction could be further progressed by adding new monomers after the reaction had finished. **2b** (2.4  $\mu\text{l}$ , 0.013 mmol) and **3b** (4.0  $\mu\text{l}$ , 0.013 mmol) in  $\text{thf-d}_8$  (600  $\mu\text{l}$ ) were added in an NMR tube under nitrogen atmosphere. Complex **1b** (0.89 mg, 0.0025 mmol; 20 mol%) was added in the solution. The mixture was allowed to react at 30 °C for 2d, during which the reaction was monitored by  $^1\text{H}$  NMR spectroscopy. The mixture (20  $\mu\text{l}$ ) of **2b** (4.8  $\mu\text{l}$ , 0.026 mmol) and **3b** (8.0  $\mu\text{l}$ , 0.026 mmol) in  $\text{C}_6\text{D}_6$  (87  $\mu\text{l}$ ) was added in reaction mixture. No further polymerization was observed.

## 13. Reaction of 2,5-di(hex-1-yn-1-yl)thiophene (**2c**) with 2,5-di(buta-1,3-dien-1-yl)pyridine (**3a**)

This experiment was conducted for observation of the initial stage of polymerisation. **2c** (7.1  $\mu\text{l}$ , 0.028 mmol) and **3a** (5.24 mg, 0.0286 mmol) in  $\text{C}_6\text{D}_6$  (600  $\mu\text{l}$ ) was added in an NMR tube under nitrogen atmosphere. Complex **1b** (1.29 mg, 0.00367 mmol; 13 mol%) was added in the solution. The mixture was allowed to react at 23 °C for 1d, during which the reaction was monitored by  $^1\text{H}$  NMR spectroscopy. Dimers were predominantly produced within 5 minutes, where the butadienyl group at the 2 position preferentially reacted to give the dimer.

## 14. Stoichiometric Reaction of **1b** with **3b** in the presence of MeCN

**3b** (2.9  $\mu\text{l}$ , 0.015 mmol) in  $\text{C}_6\text{D}_6$  (500  $\mu\text{l}$ ) was added in an NMR tube under nitrogen atmosphere. To the solution was added MeCN (1.60  $\mu\text{l}$ , 0.030 mmol) by a hypodermic syringe at room temperature. Complex **1b** (5.36 mg, 0.0153 mmol) was added to the solution. The mixture was allowed to react at room temperature for 80 min, during which the reaction was monitored by  $^1\text{H}$  NMR spectroscopy. The

solution was added 2,5-di(oct-1-yn-1-yl)thiophene (**2b**) (4.7  $\mu$ l, 0.015 mmol) by a hypodermic syringe at room temperature. Reaction of complex with alkyne did not proceed even at 50 °C and the mixture was allowed to react at 70 °C for 1d, the solution became a complex mixture. Although detailed characterisation was difficult, we assumed the formation of a complex similar to **5a** and **5b** in an approximately 1/1 ratio.

## 15. UV-Vis measurements

The UV-Vis spectra of **4aa**, **4ab** and **7<sup>s</sup>** were measured in a spectroscopic grade thf solution (or acetone) using a quartz cell (cell length = 1.0 cm) at the concentration of 0.010 mM.

## 16. Fluorescence measurements

The fluorescence spectra of **4aa**, **4ab** and trimer **7** were measured in a spectroscopic grade thf solution using a quartz cell (cell length = 1.0 cm) at the concentration of 0.10 mM at room temperature. Although the excitation spectra of **4aa**, **4ab** and **7** were measured, no peaks were observed due to poor signal-to-noise ratio. These optimum excitation wavelengths were therefore screened for wavelengths giving the strongest fluorescence intensity in the range of 350-550 nm at room temperature. As the result, the optimum excitation wavelengths for **4ab** and **7** were found to be 400 nm. On the other hand, no significant fluorescence was observed for **4aa** by excitation in these wavelength range but that excited at 400 nm was depicted in Figure 3.

## 17. Cyclic voltammetry

The CV spectra of **4aa**, **4ab** and **7** (1.0 mM) were recorded in a spectroscopic grade thf solution at the Pt electrodes with [Bu<sub>4</sub>N][ClO<sub>4</sub>] (0.1 M) as the supporting electrolyte at a sweep rate of 10 mVs<sup>-1</sup>. Pt was employed as the working electrode, and the potential scale was corrected with the standard redox potential of ferrocene ( $E^\circ = +0.380$  V).

## 18. MALDI-TOF MS

The MALDI-TOF MS of conjugated compounds were measured with trans-2-[3-(4-tert-Butylphenyl)-2-methyl-2-propenylidene]malononitrile (DTCB) by linear positive mode.

## 19. GPC measurements

The GPC measurements of **4aa** and **4ab** were performed at 40 °C using tetrahydrofuran as the eluent at a flow rate of 0.35 ml/min. The polymer solution was prepared at the saturation concentration of tetrahydrofuran (approx. 2 mg in 2 ml) followed by filtration through a polytetrafluoroethylene filter. The calibration was made by use of polystyrene standard (Tosoh Corporation).

## 20. References

- (1) M. A. Bennett, H. Neumann, M. Thomas, X.-Q. Wang, P. Pertici, P. Salvadori and G. Vitulli, *Organometallics* 1991, **10**, 3237.
- (2) Y. Hiroi, N. Komine, S. Komiya and M. Hirano, *Organometallics*, 2014, **33**, 6604.
- (3) C. A. Busacca, E. Farber, J. DeYoung, S. Campbell, N. C. Gonnella, N. Grinberg, N. Haddad, H. Lee, S. Ma, D. Reeves, S. Shen and C. H. Senanayake, *Org. Lett.*, 2009, **11**, 5594.
- (4) V. T. Nguyen, H. T. Dang, H. H. Pham, V. D. Nguyen, C. Flores-Hansen, H. D. Arman and O. V. Larionov, *J. Am. Chem. Soc.*, 2018, **140**, 8434.
- (5) S. Kiyota, K. Kamakura, N. Komine and M. Hirano, *Org. Biomol. Chem.*, 2023, **17**, 3588.

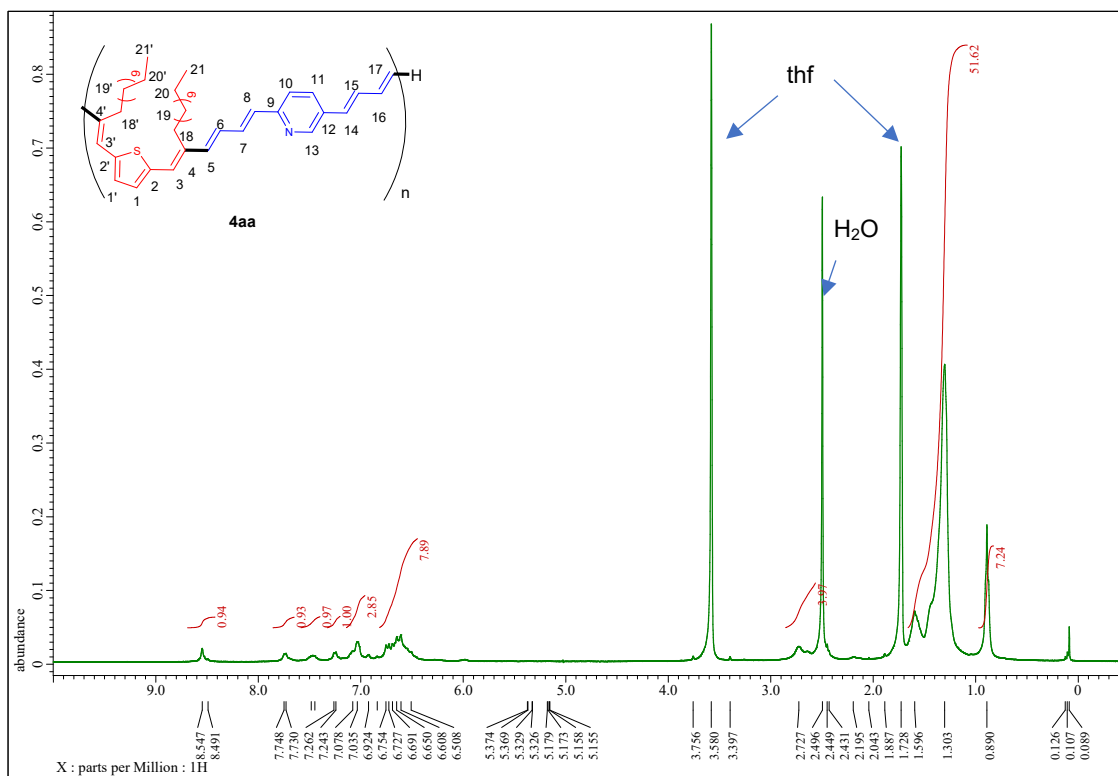

Figure S1.  $^1\text{H}$  NMR Spectrum of **4aa** in  $\text{thf-d}_8$ .

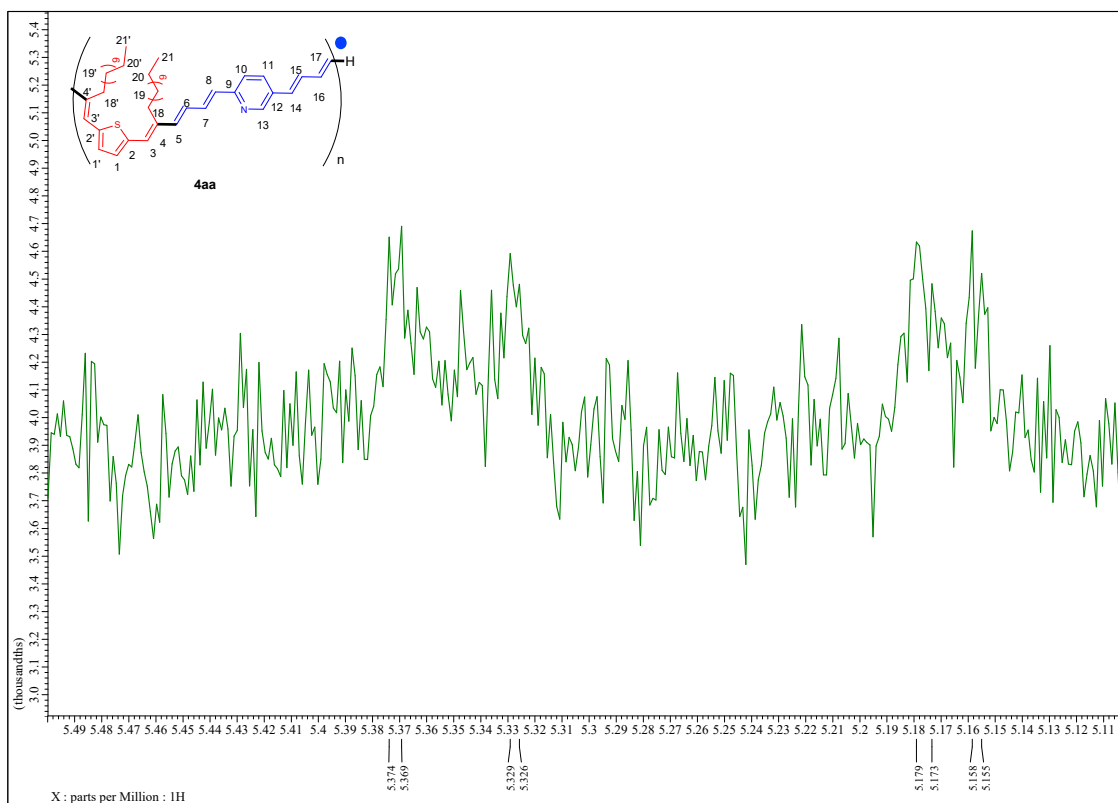

Figure S1-2.  $^1\text{H}$  NMR Spectrum (5.1-5.5 ppm) of **4aa** in  $\text{thf-d}_8$ .



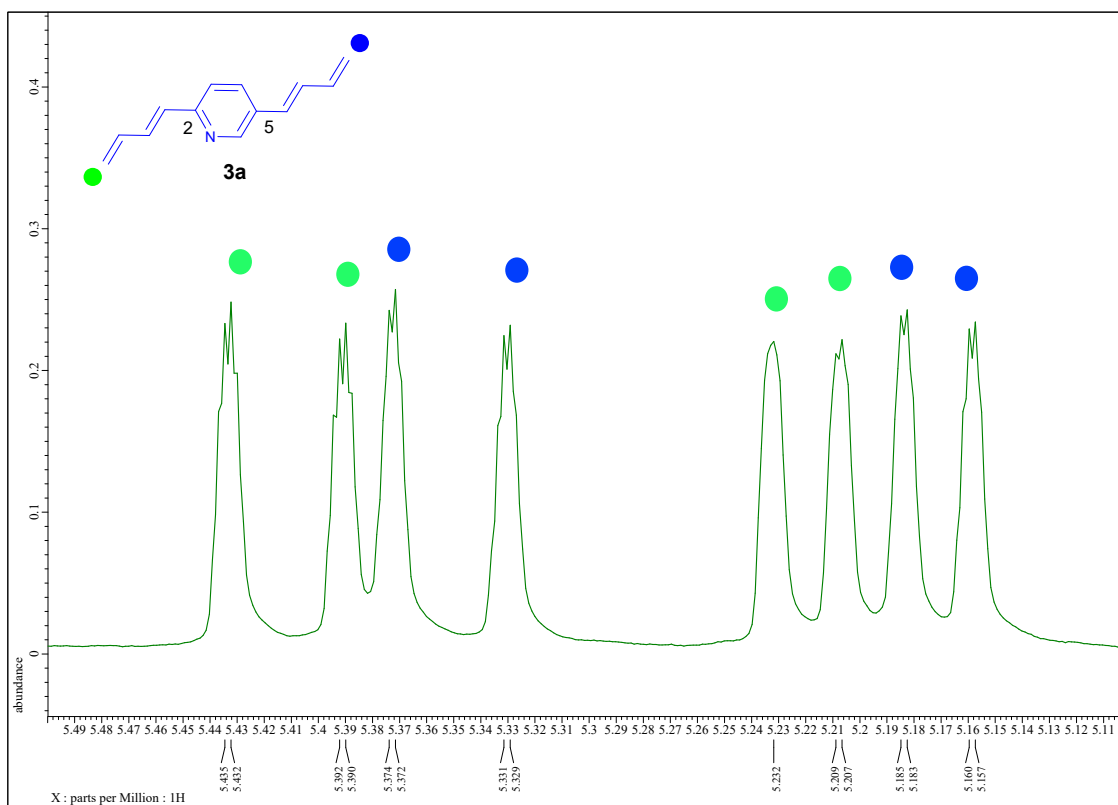

**Figure S2.  $^1\text{H}$  NMR Spectrum (5.1-5.5 ppm) of 3a in thf- $d_8$ .**

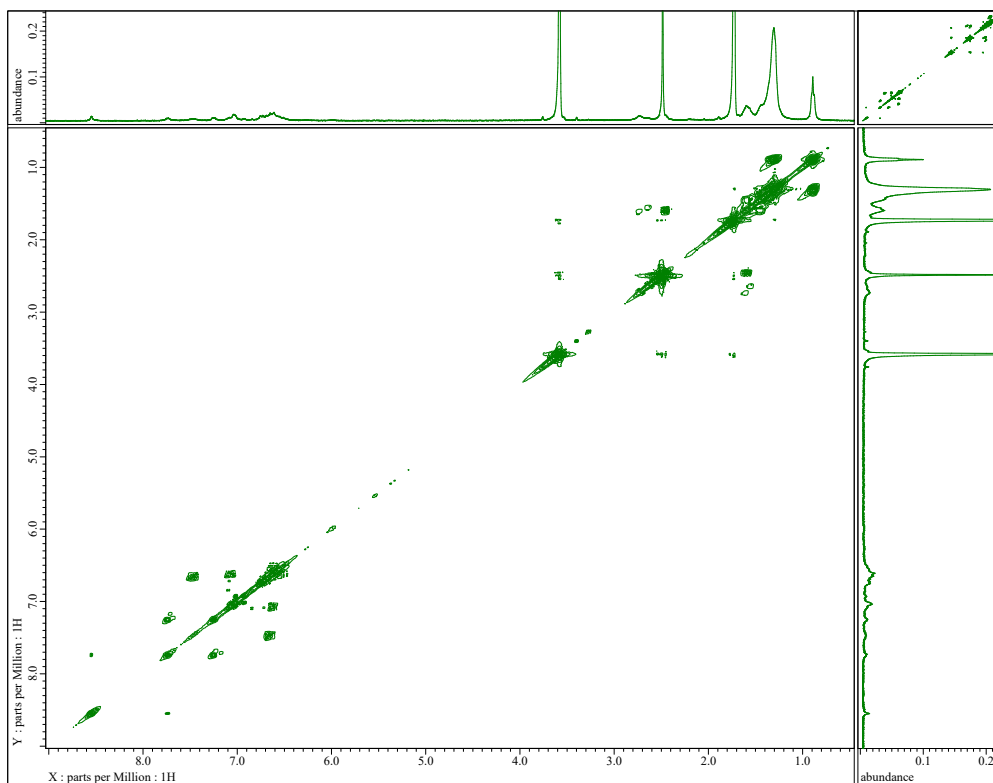

**Figure S3.  $^1\text{H}$ - $^1\text{H}$  COSY NMR Spectrum of 4aa in thf- $d_8$ .**

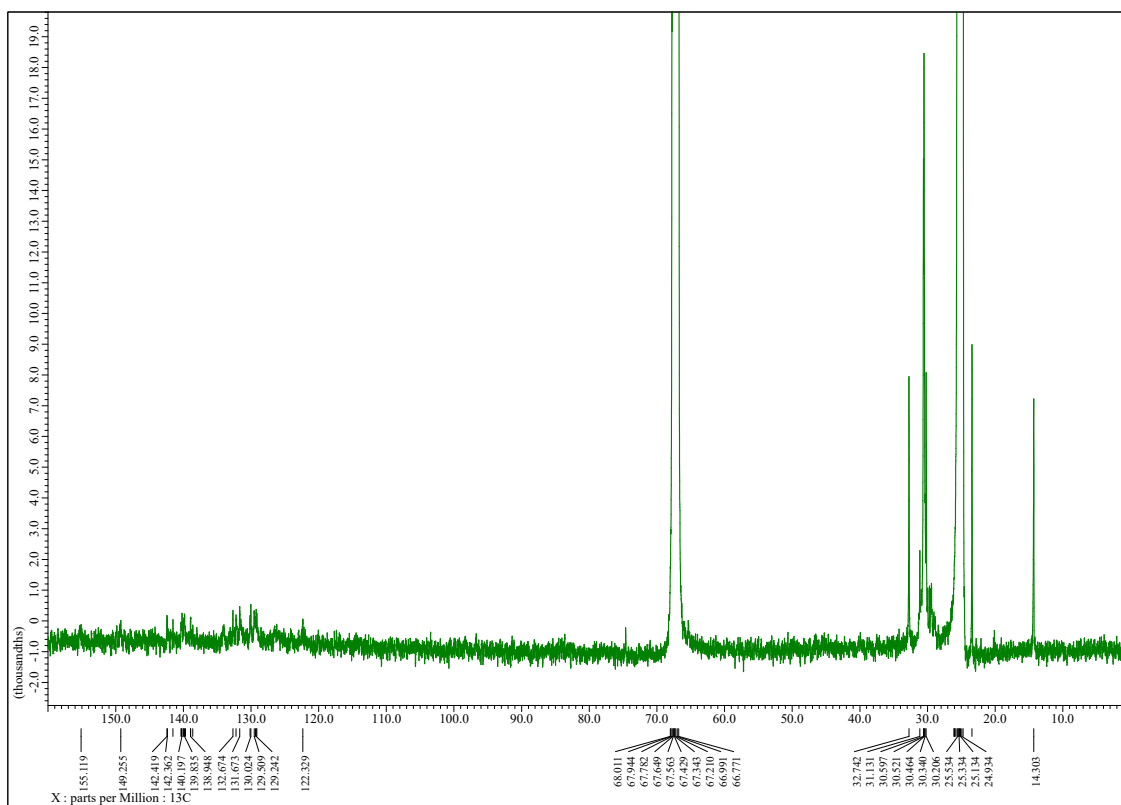

**Figure S4.  $^{13}\text{C}\{^1\text{H}\}$  NMR Spectrum of 4aa in  $\text{thf-d}_8$ .**

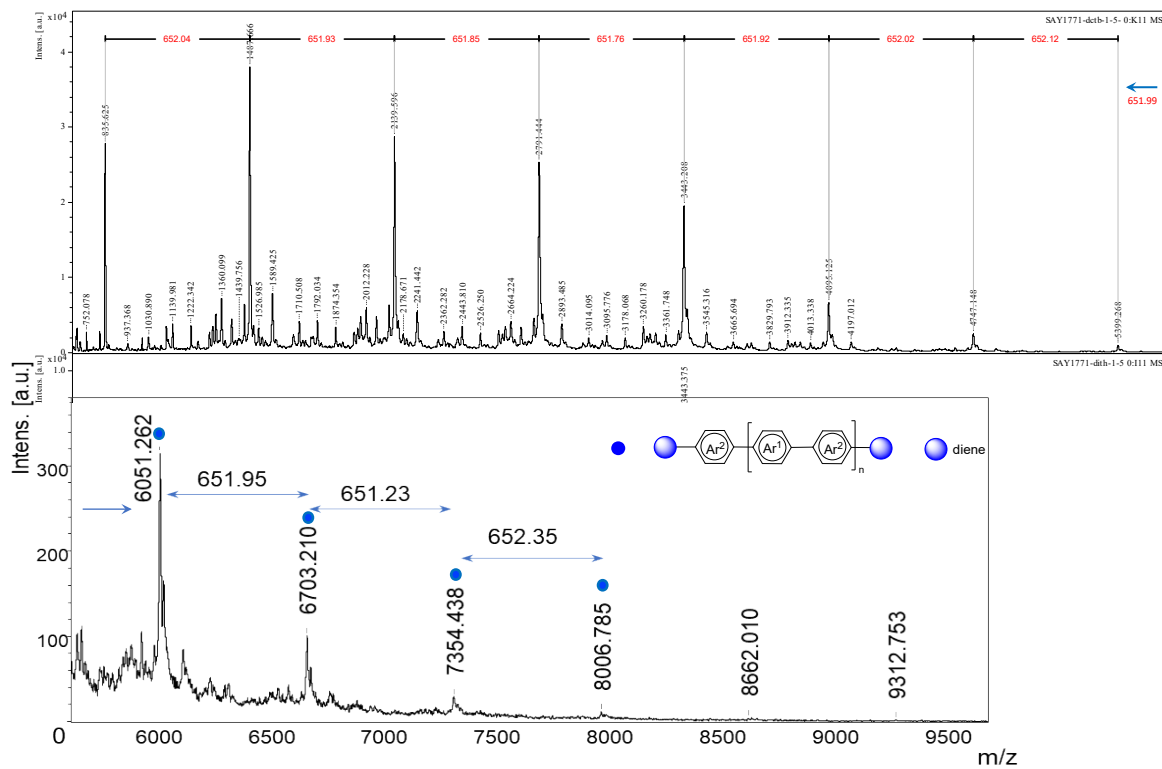

**Figure S5. MALDI-TOF MS of 4aa.  $\text{Ar}^1$ : thienyl fragment.  $\text{Ar}^2$ : pyridyl fragment. The conjugated trienyl fragments were omitted in the structure drawing.**

Chromatogram report

Header

|               |             |                                |                     |
|---------------|-------------|--------------------------------|---------------------|
| Title         |             | Data acquisition date and time | 2023/10/03 14:33:03 |
| Sample name   | <b>4aa</b>  | Calculation date and time      | 2023/10/03 14:40:36 |
| Database name | 2023-10.chd | Acquisition time [min]         | 4.000 - 11.900      |
| Data name     | RSLT0005    | Sampling interval [msec]       | 100                 |
| Method name   | 20231002STD | Cup number                     | 2                   |
| Channel       | RI          | Calculation type               | Molecular Weight    |

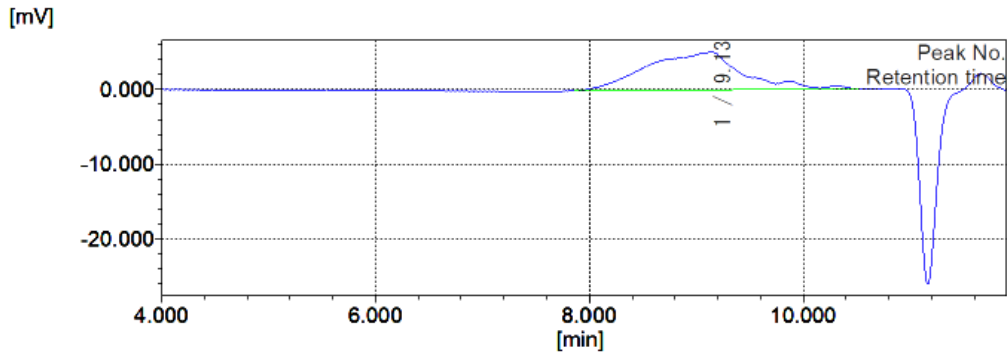

Result of molecular weight calculation (RI)

|                  |        |        |             |       |        |
|------------------|--------|--------|-------------|-------|--------|
| Peak 1 Base Peak |        |        |             | Mn    | 8,111  |
|                  | [min]  | [mV]   | [mol]       | Mw    | 14,811 |
| Peak start       | 7.862  | -0.156 | 88,937      | Mw/Mn | 1.826  |
| Peak top         | 9.130  | 5.056  | 8,590       |       |        |
| Peak end         | 10.515 | 0.110  | 588         |       |        |
| Height [mV]      |        |        | 5.085       |       |        |
| Area [mV*sec]    |        |        | 314.278     |       |        |
| Area% [%]        |        |        | 100.000     |       |        |
| [eta]            |        |        | 14811.10086 |       |        |

Result of molecular weight calculation (RI)

|               |        |        |             |       |        |
|---------------|--------|--------|-------------|-------|--------|
| Total         |        |        |             | Mn    | 8,111  |
|               | [min]  | [mV]   | [mol]       | Mw    | 14,811 |
| Peak start    | 7.862  | -0.156 | 88,937      | Mw/Mn | 1.826  |
| Peak top      | 9.130  | 5.056  | 8,590       |       |        |
| Peak end      | 10.515 | 0.110  | 588         |       |        |
| Height [mV]   |        |        | 5.085       |       |        |
| Area [mV*sec] |        |        | 314.278     |       |        |
| Area% [%]     |        |        | 100.000     |       |        |
| [eta]         |        |        | 14811.10086 |       |        |

**Figure S6. GPC Calculation result of 4aa.**

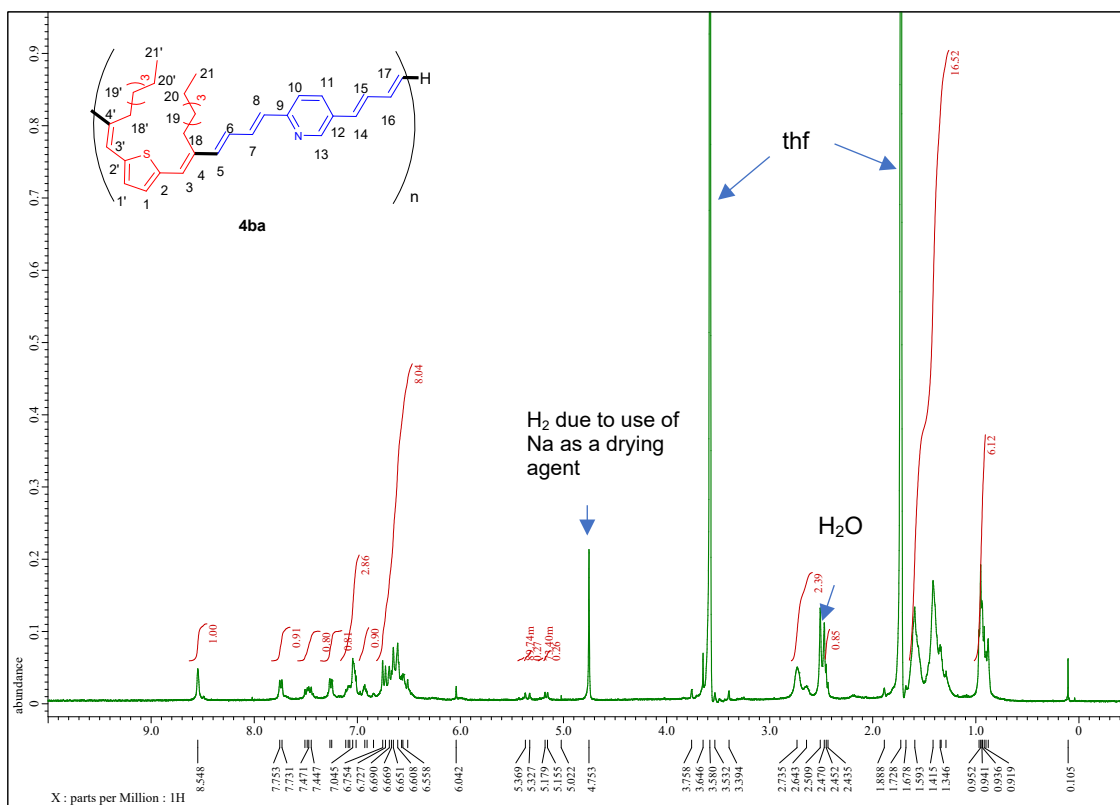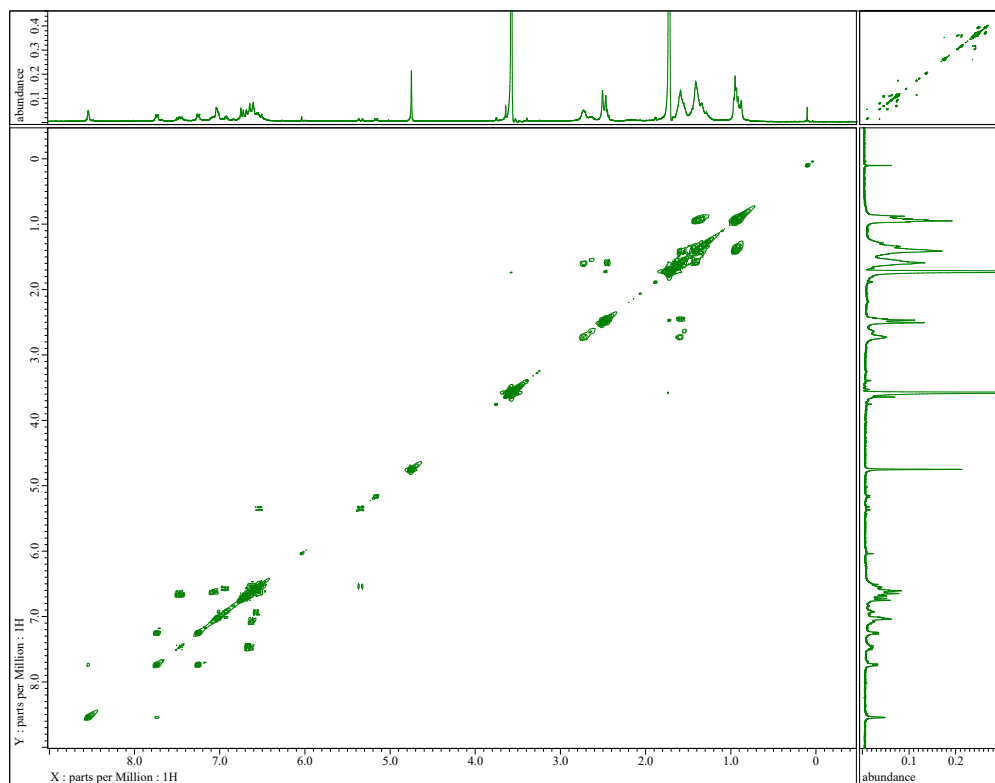

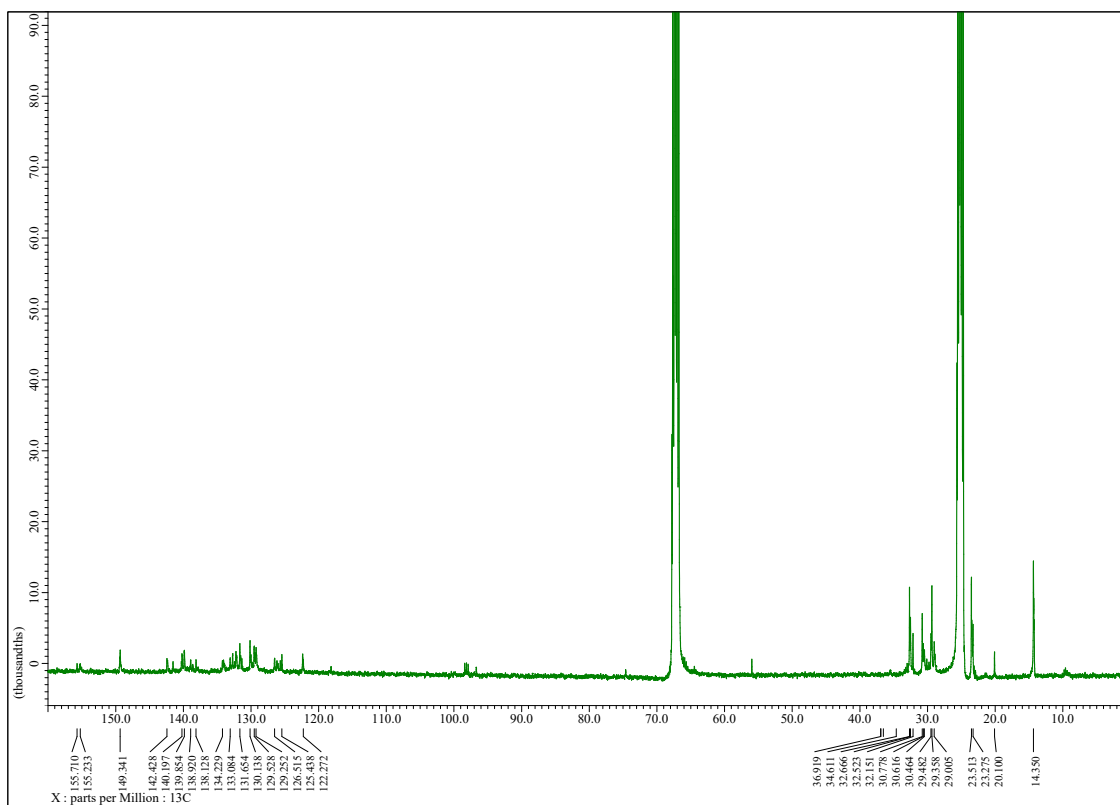

Figure S9.  $^{13}\text{C}\{^1\text{H}\}$  NMR Spectrum of 4ba in thf- $\text{d}_8$

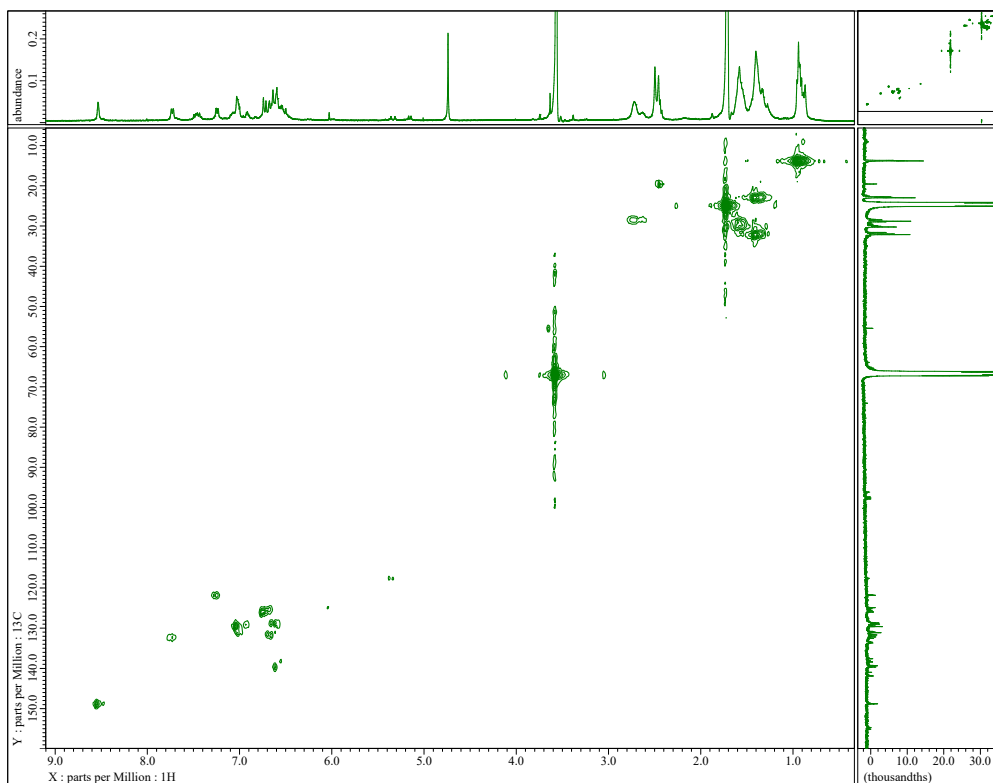

Figure S10.  $^{13}\text{C}$ - $^1\text{H}$  Correlation Spectrum of 4ba in thf- $\text{d}_8$  (HMQC).

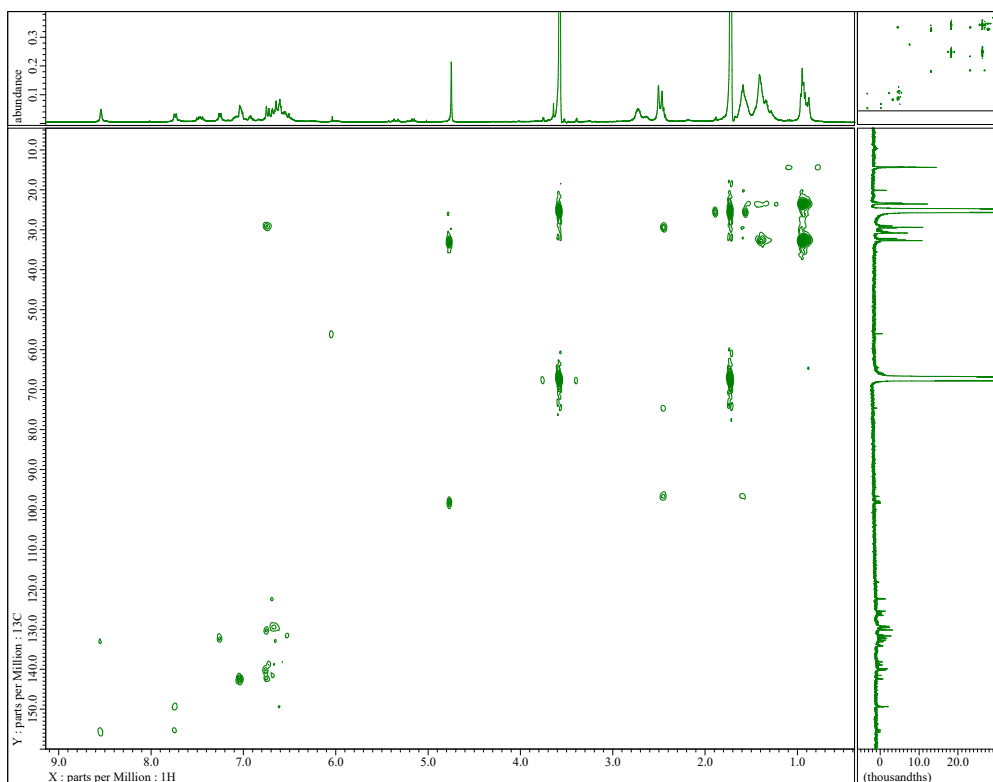

Figure S11.  $^{13}\text{C}$ - $^1\text{H}$  Correlation Spectrum of 4ba in  $\text{thf-d}_8$  (HMBC).

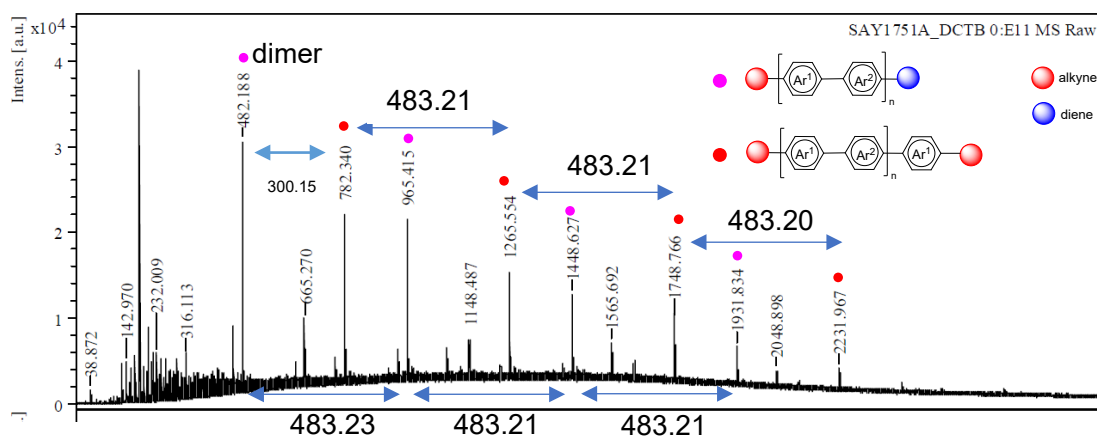

Figure S12. MALDI-TOF MS of 4ba. **Ar<sup>1</sup>: thienyl fragment. Ar<sup>2</sup>: pyridyl fragment. The conjugated trienyl fragments were omitted in the structure drawing.**

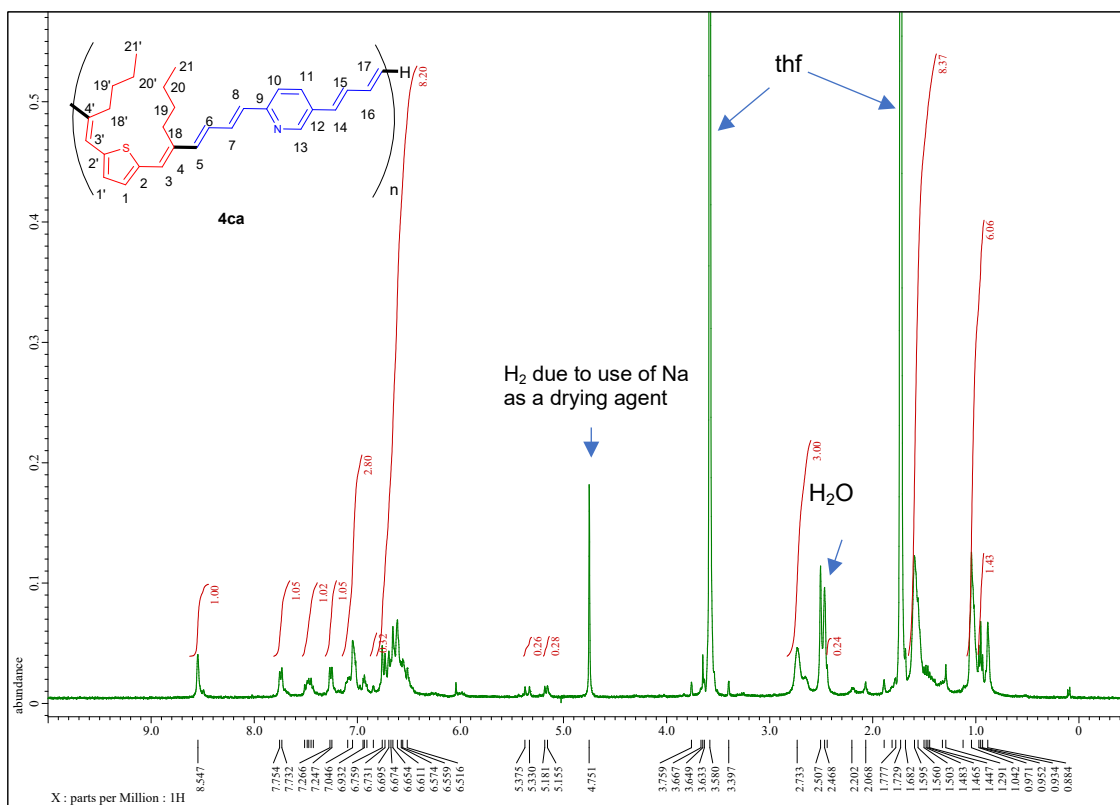

**Figure S13.  $^1\text{H}$  NMR Spectrum of 4ca in  $\text{thf-d}_8$ .**

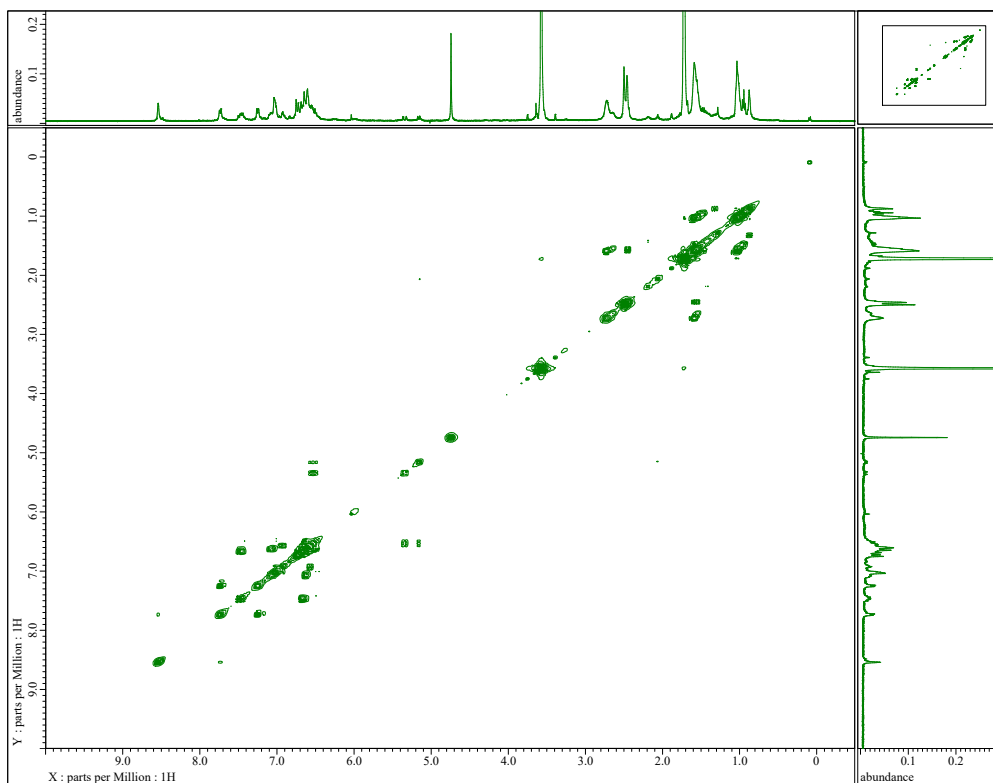

**Figure S14.  $^1\text{H}$ - $^1\text{H}$  COSY NMR Spectrum of 4ca in  $\text{thf-d}_8$ .**

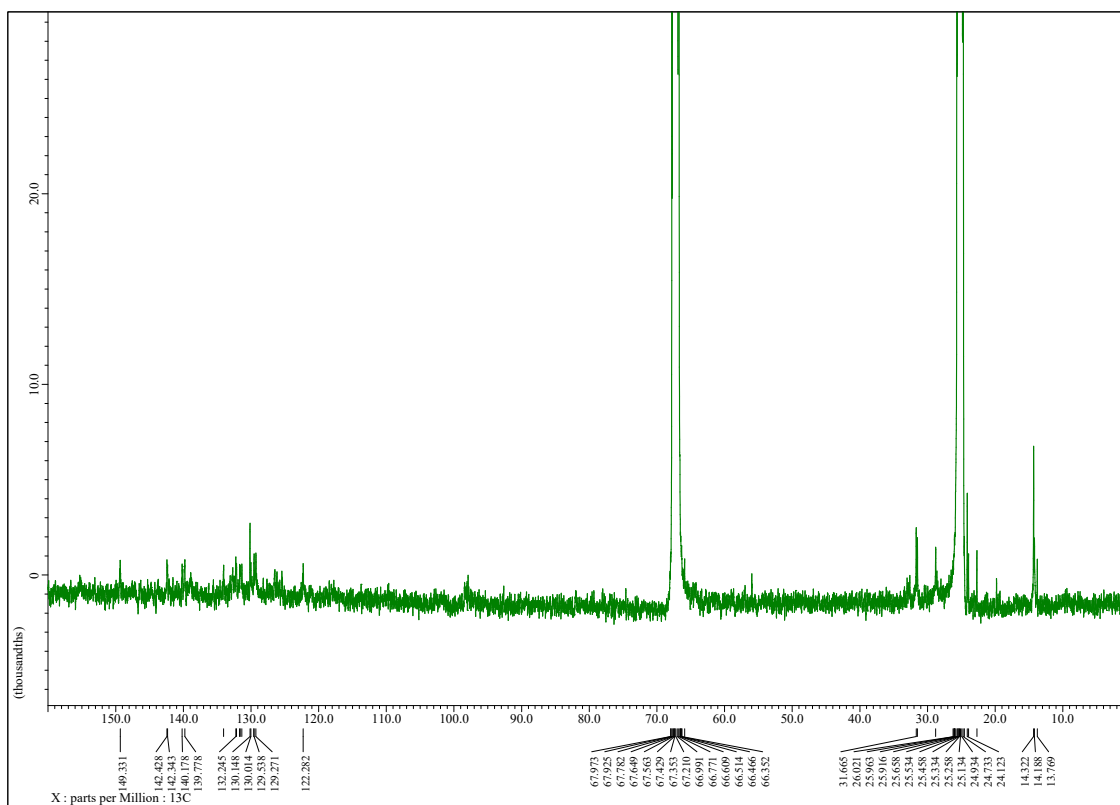

Figure S15.  $^{13}\text{C}\{^1\text{H}\}$  NMR Spectrum of 4ca in thf- $\text{d}_8$ .

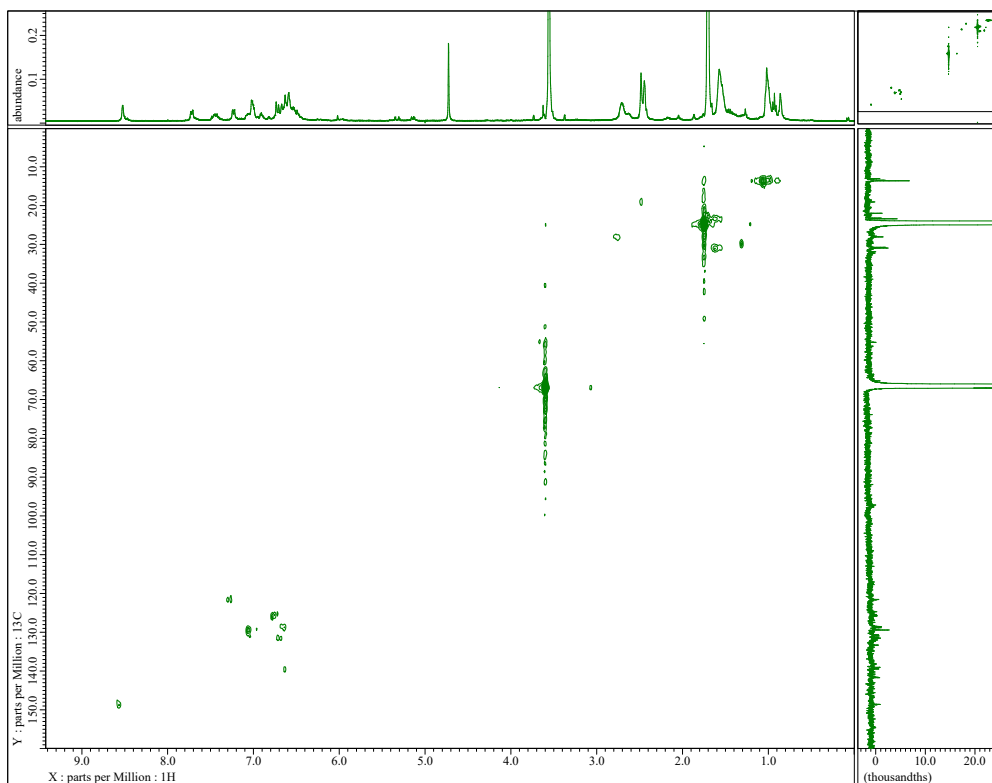

Figure S16.  $^{13}\text{C}$ - $^1\text{H}$  Correlation Spectrum of 4ca in thf- $\text{d}_8$  (HMQC).



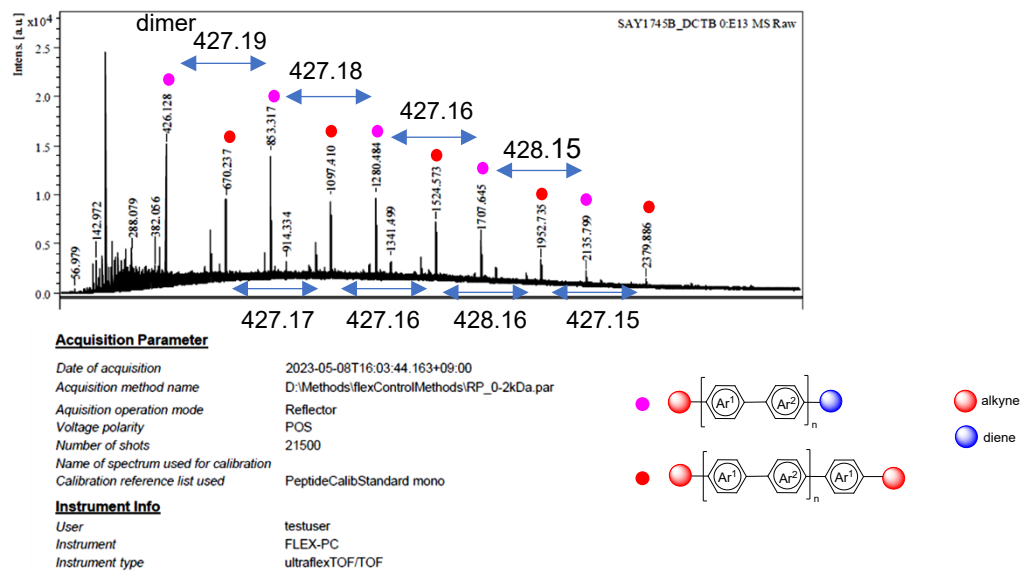

Figure S17. MALDI-TOF MS of 4ca. **Ar<sup>1</sup>: thienyl fragment. Ar<sup>2</sup>: pyridyl fragment.** The conjugated trienyl fragments were omitted in the structure drawing.

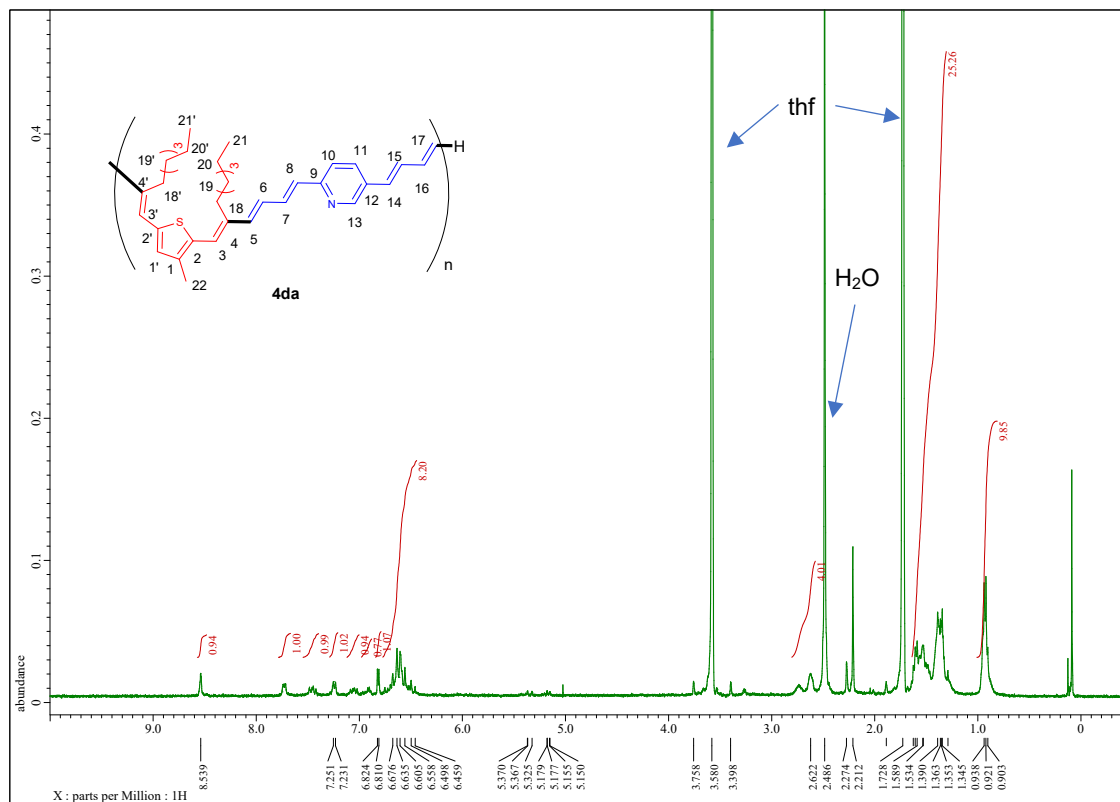

Figure S18. <sup>1</sup>H NMR Spectrum of 4da in thf-d<sub>8</sub>.

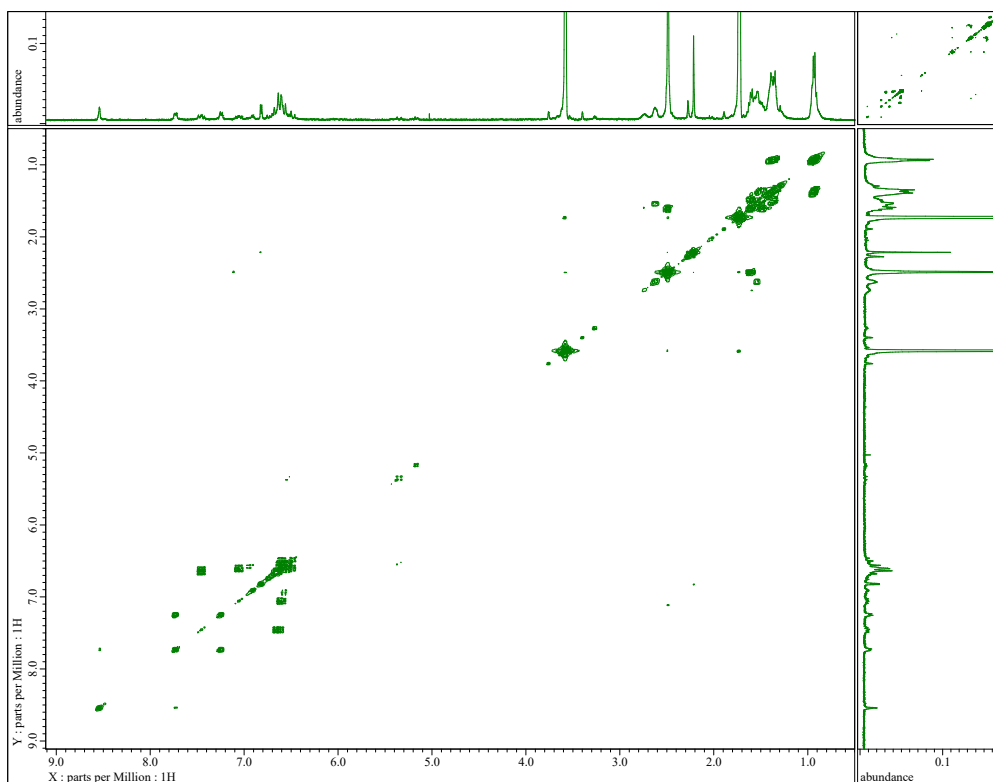

Figure S19.  $^1\text{H}$ - $^1\text{H}$  COSY NMR Spectrum of 4da in thf- $\text{d}_8$ .

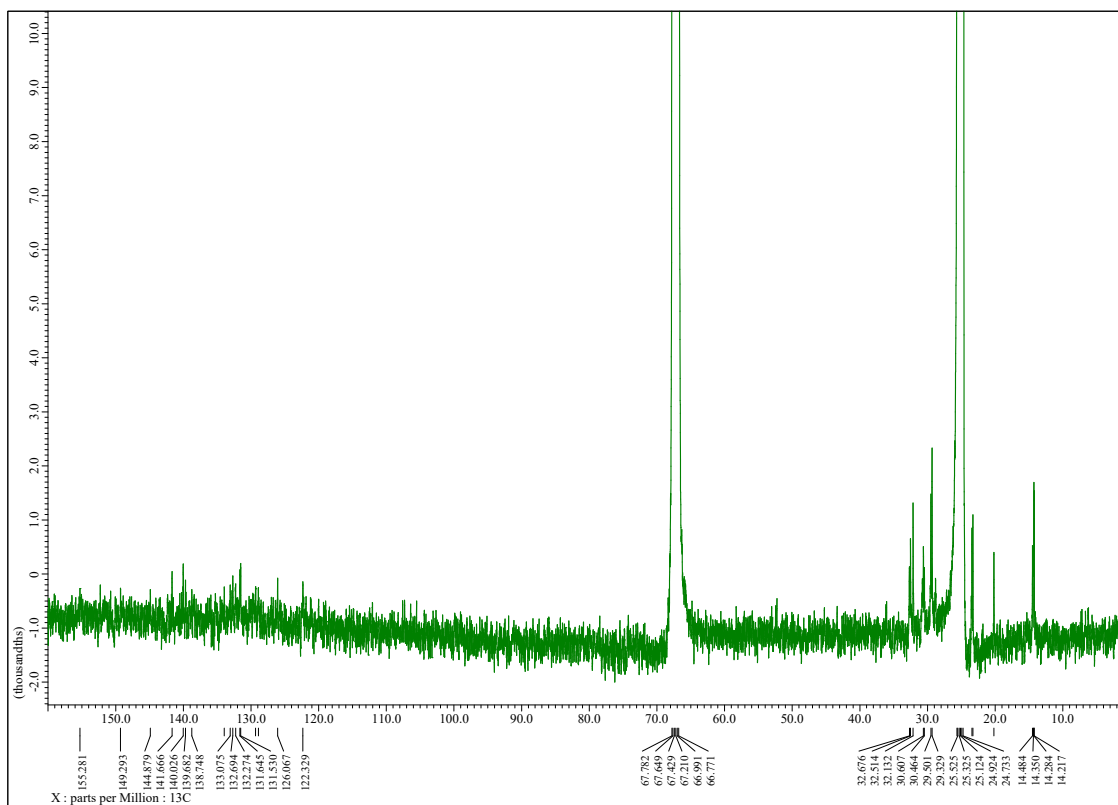

Figure S20.  $^{13}\text{C}\{^1\text{H}\}$  NMR Spectrum of 4da in thf- $\text{d}_8$ .

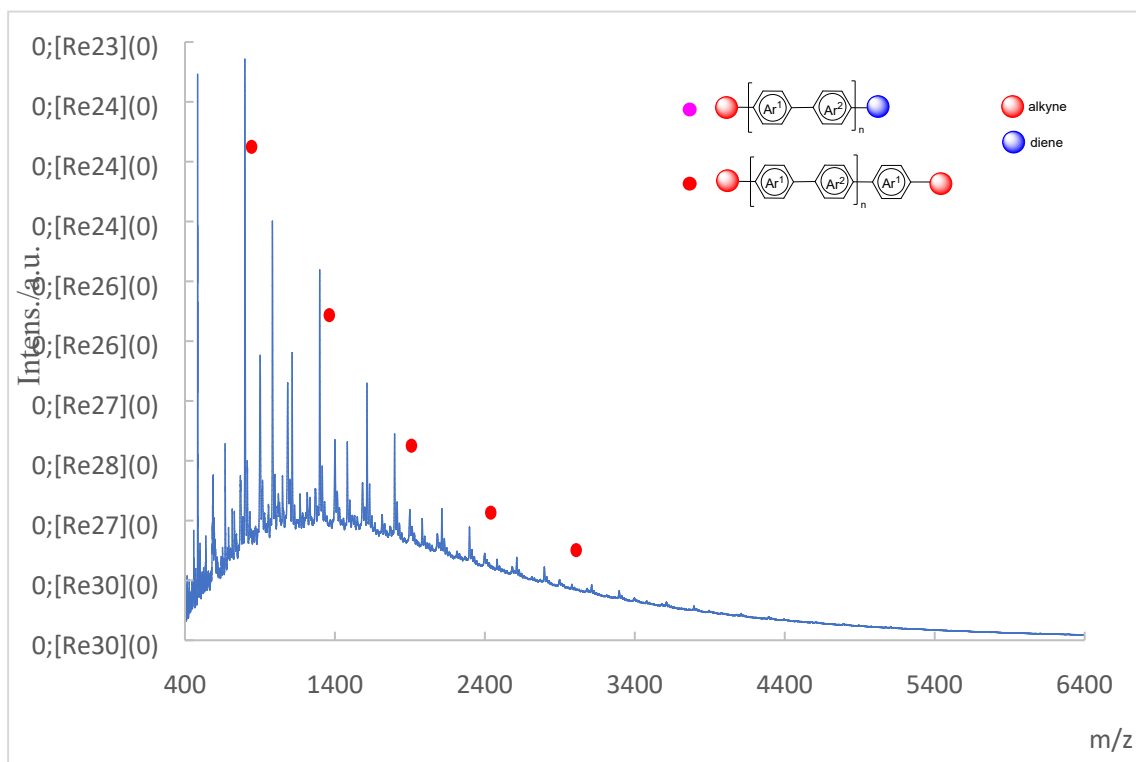

Figure S21-1. MALDI-TOF MS of 4da. Ar<sup>1</sup>: thienyl fragment. Ar<sup>2</sup>: pyridyl fragment. The conjugated trienyl fragments were omitted in the structure drawing.

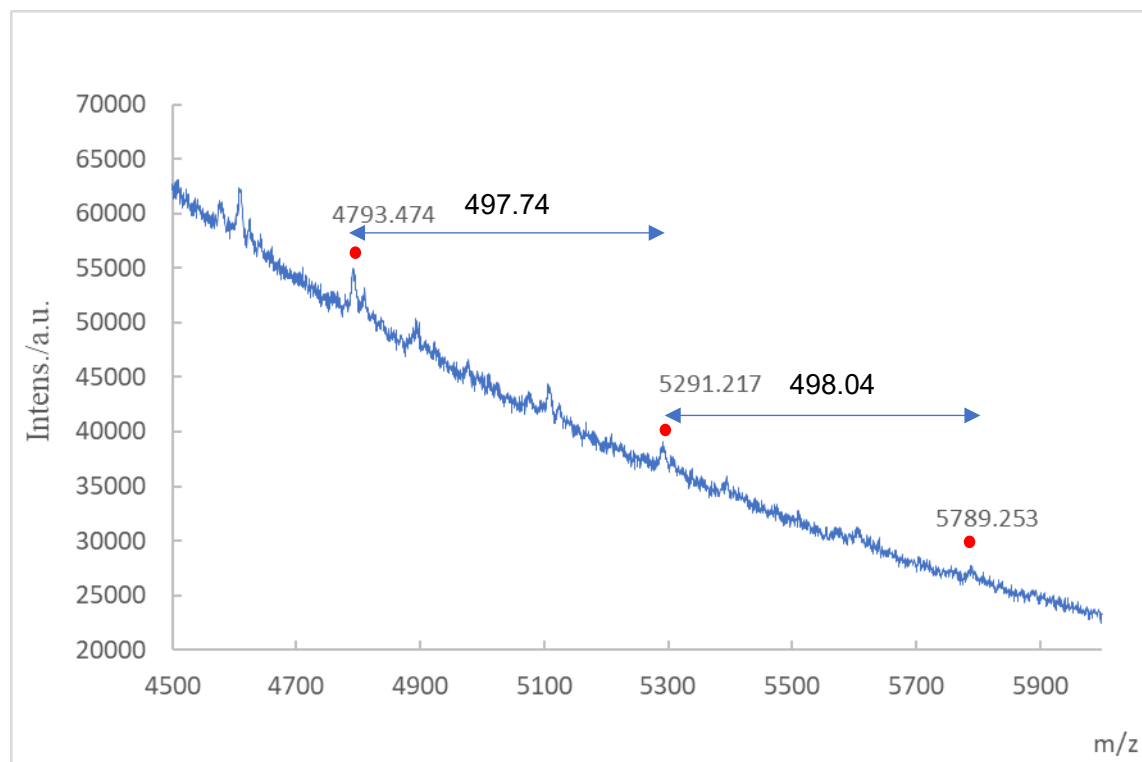

Figure S21-2. MALDI-TOF MS of 4da.

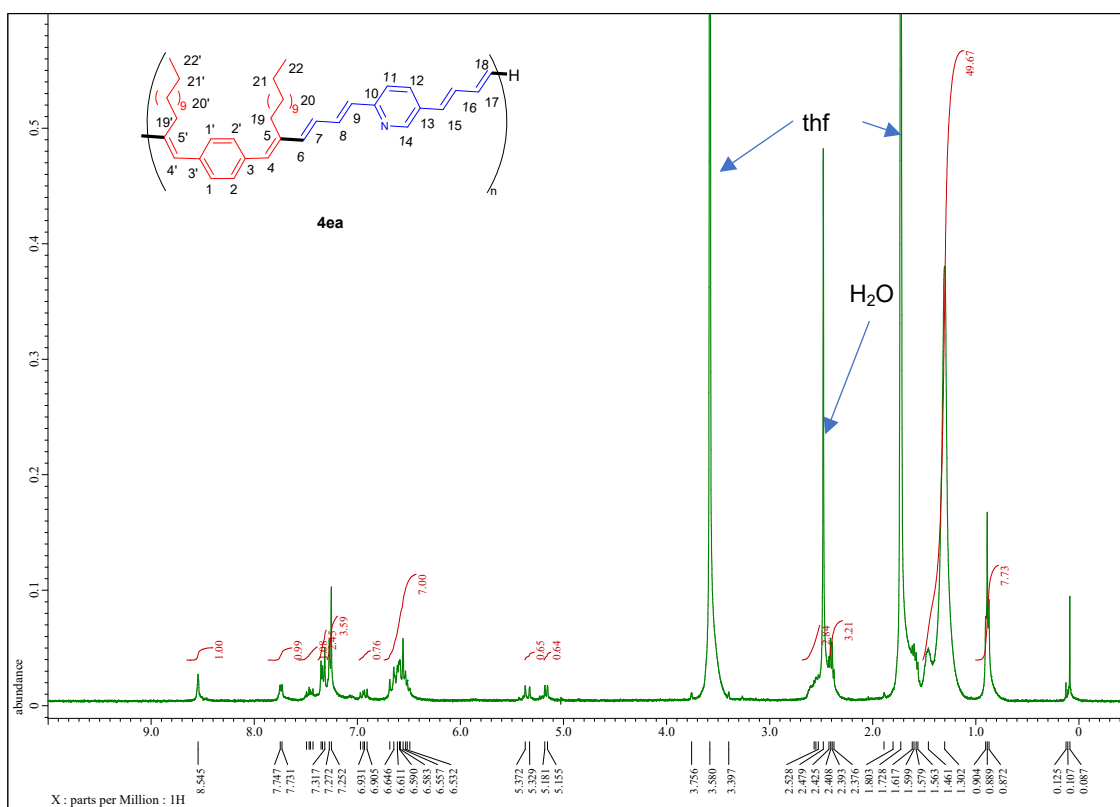

Figure S22.  $^1\text{H}$  NMR Spectrum of 4ea in  $\text{thf-d}_8$ .

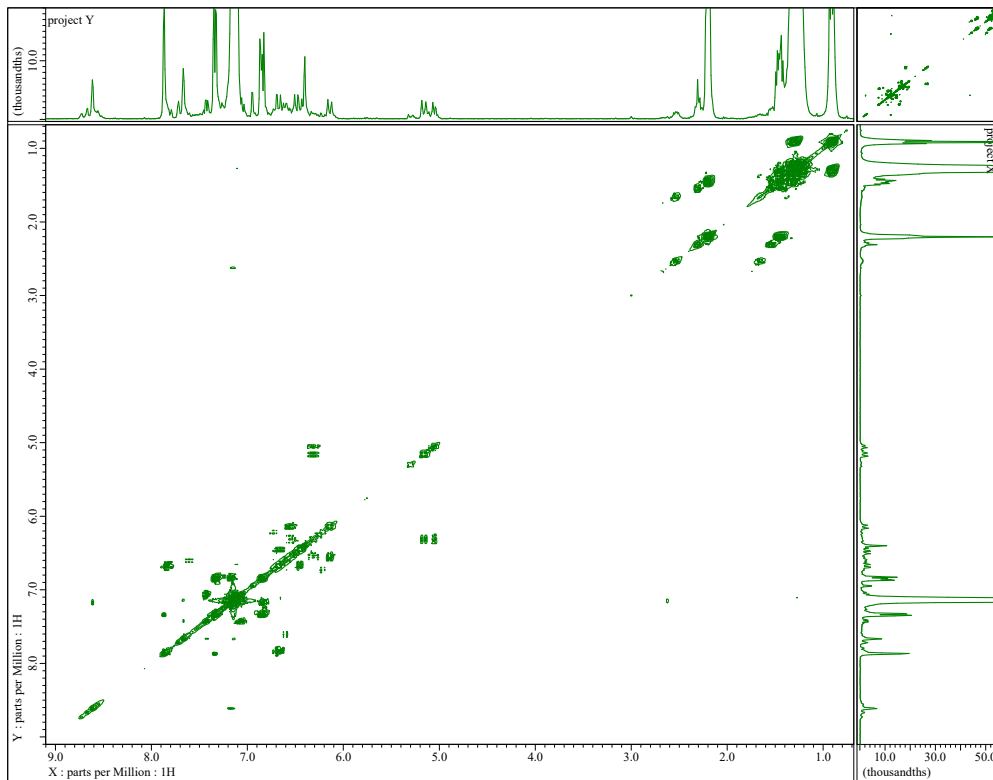

Figure S23.  $^1\text{H}$ - $^1\text{H}$  COSY NMR Spectrum of 4ea in  $\text{thf-d}_8$ .

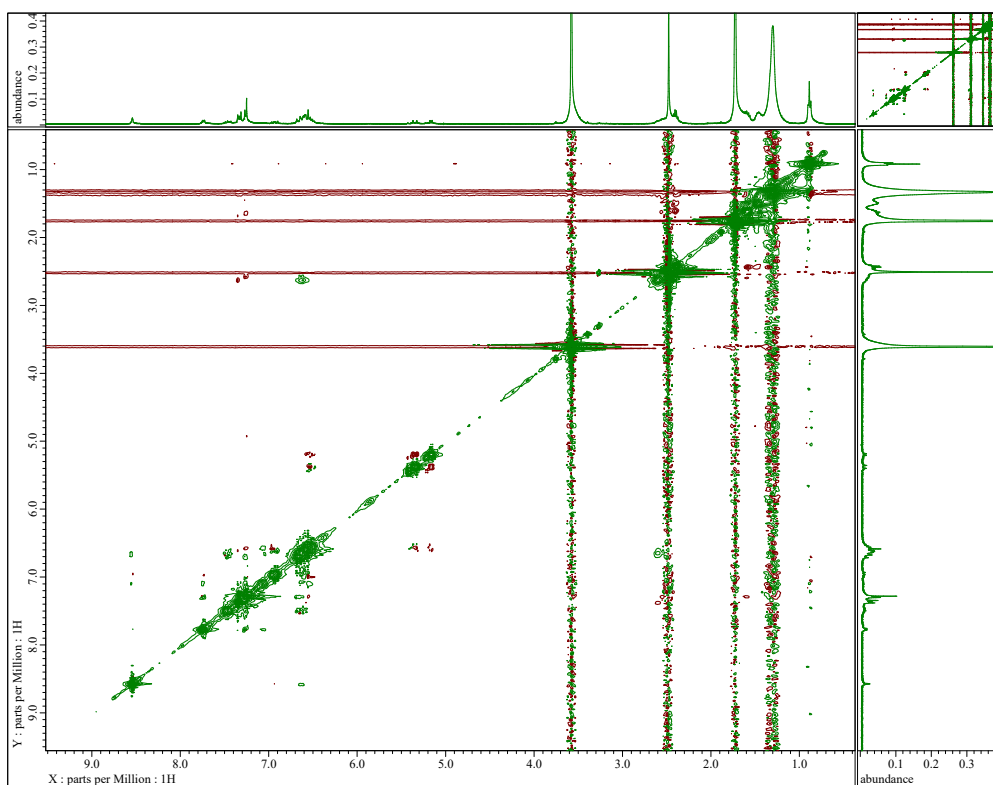

Figure S24.  $^1\text{H}$ - $^1\text{H}$  NOESY NMR Spectrum of 4ea in  $\text{thf-d}_8$ .

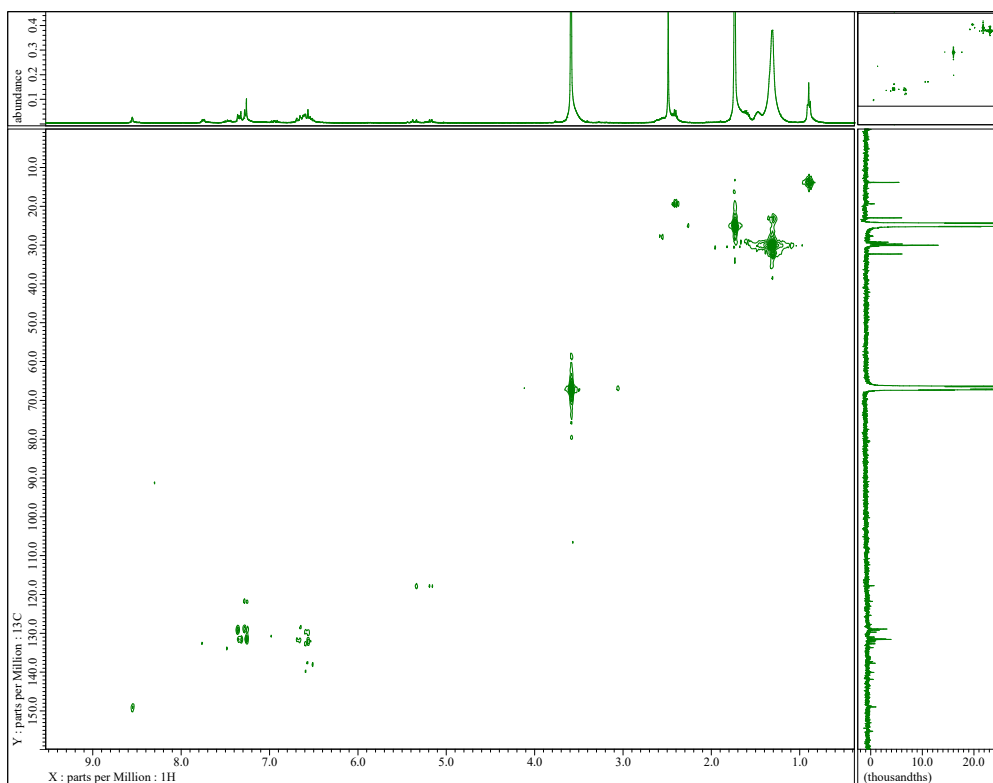

Figure S25.  $^{13}\text{C}$ - $^1\text{H}$  Correlation Spectrum of 4ea in  $\text{thf-d}_8$  (HMQC).

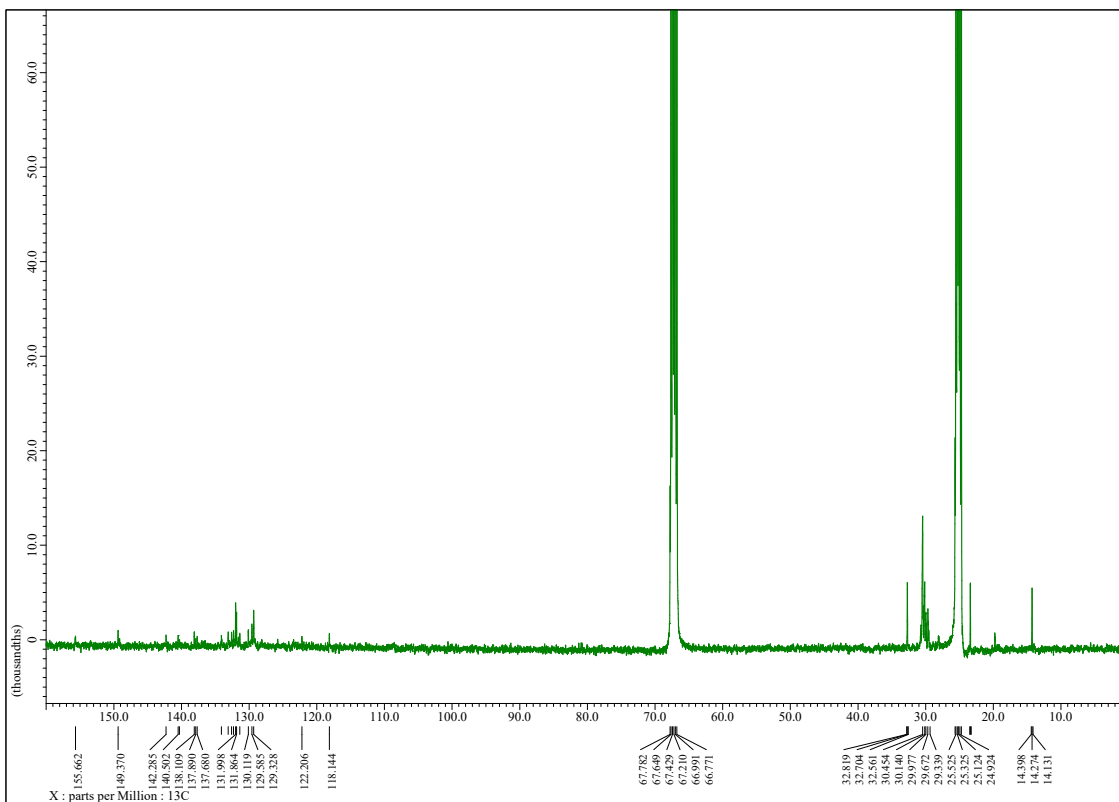

Figure S26.  $^{13}\text{C}\{^1\text{H}\}$  NMR Spectrum of 4ea in  $\text{thf-d}_8$ .

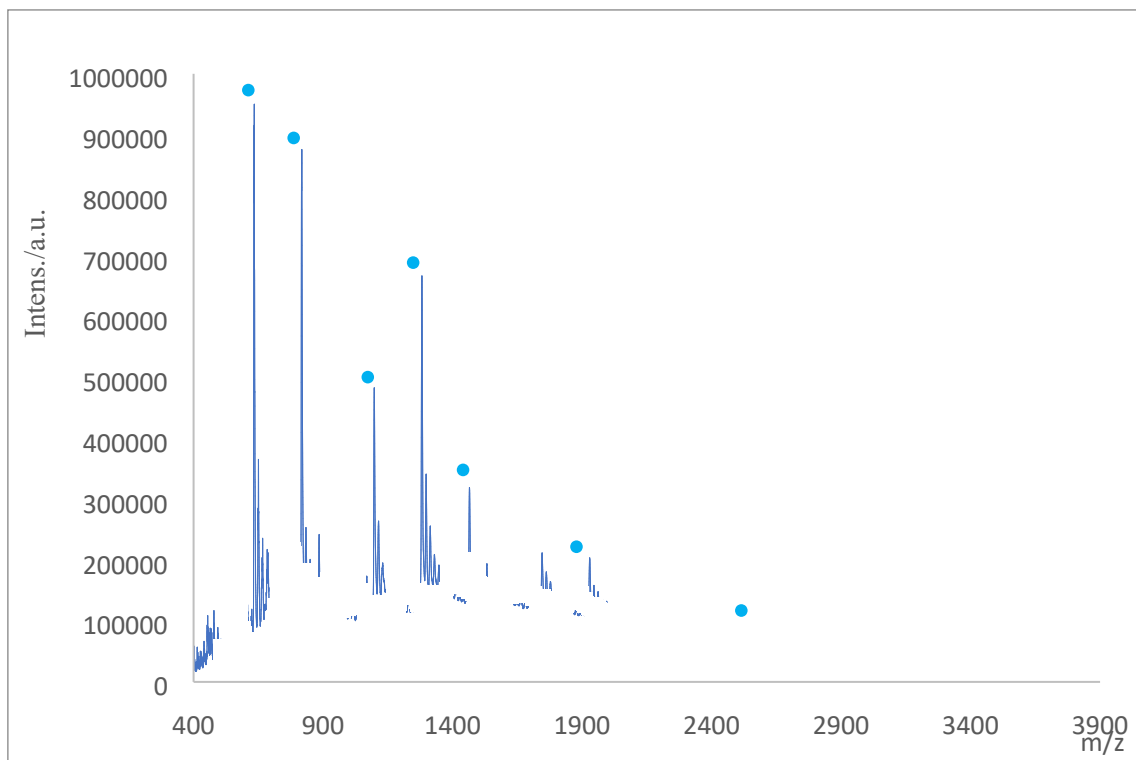

Figure S27. MALDI-TOF MS of 4ea.

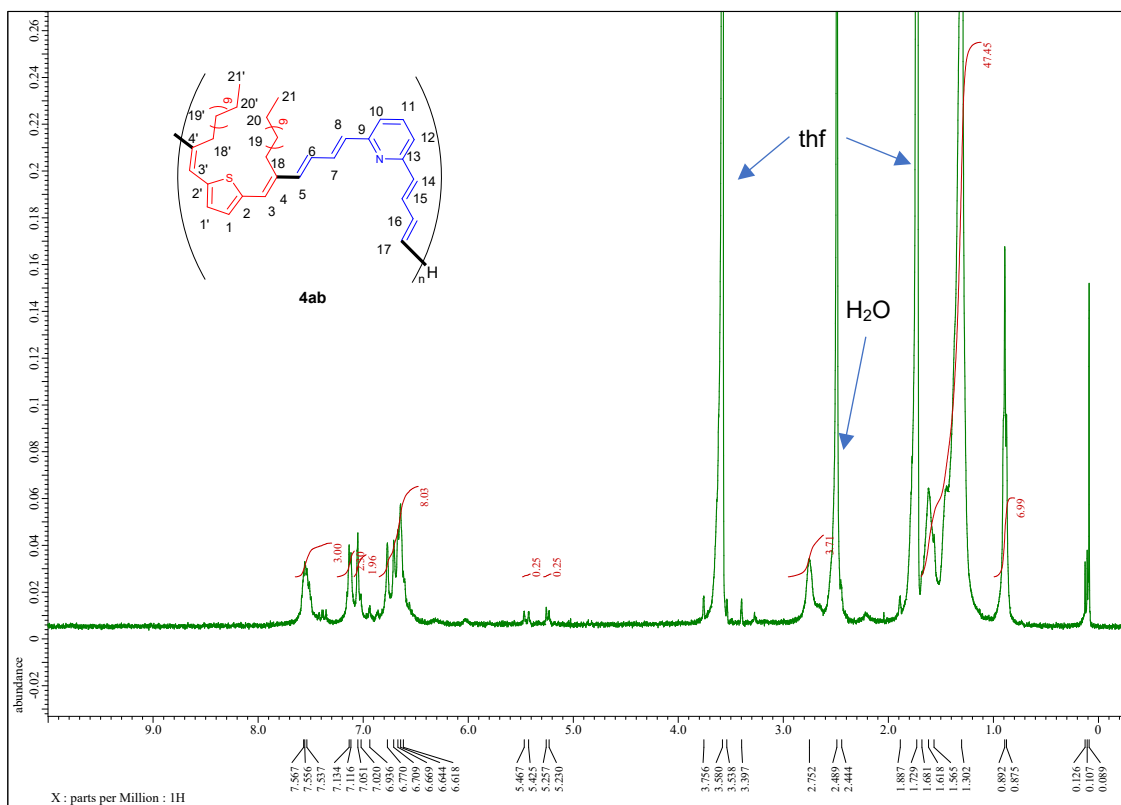

**Figure S28.  $^1\text{H}$  NMR Spectrum of 4ab in thf- $d_8$ .**

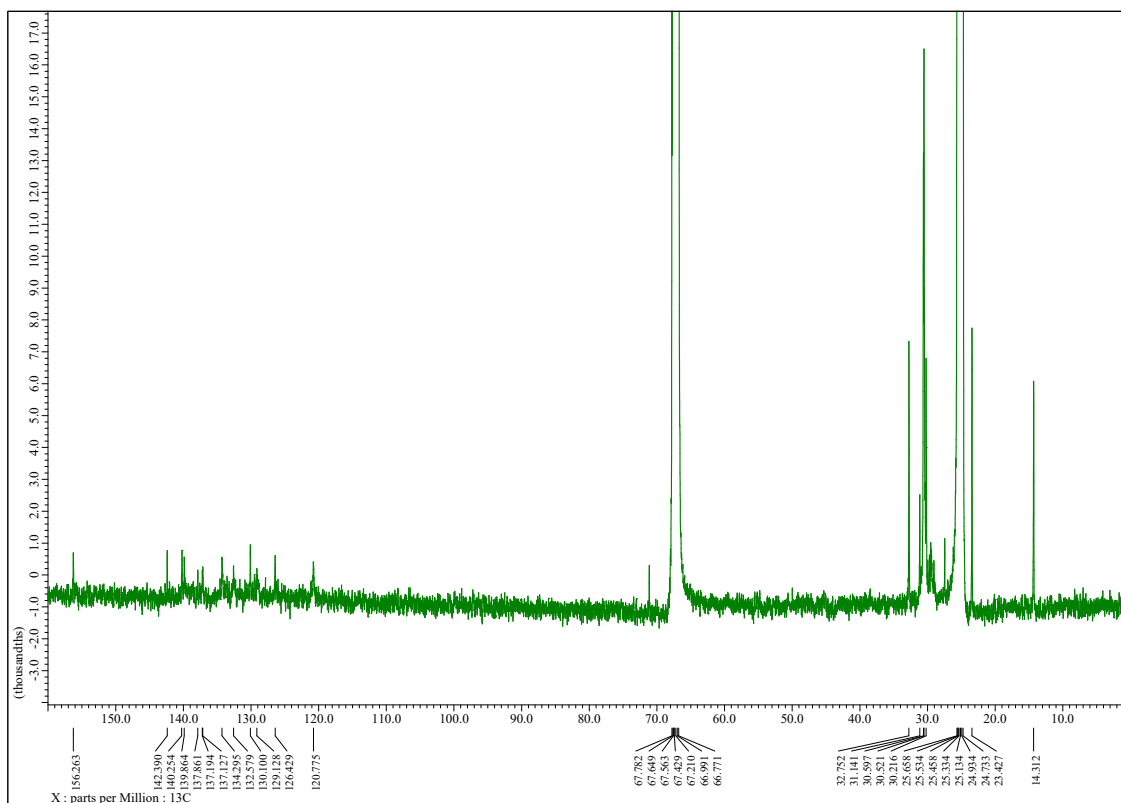

**Figure S29.  $^{13}\text{C}\{^1\text{H}\}$  NMR Spectrum of 4ab in thf- $d_8$ .**

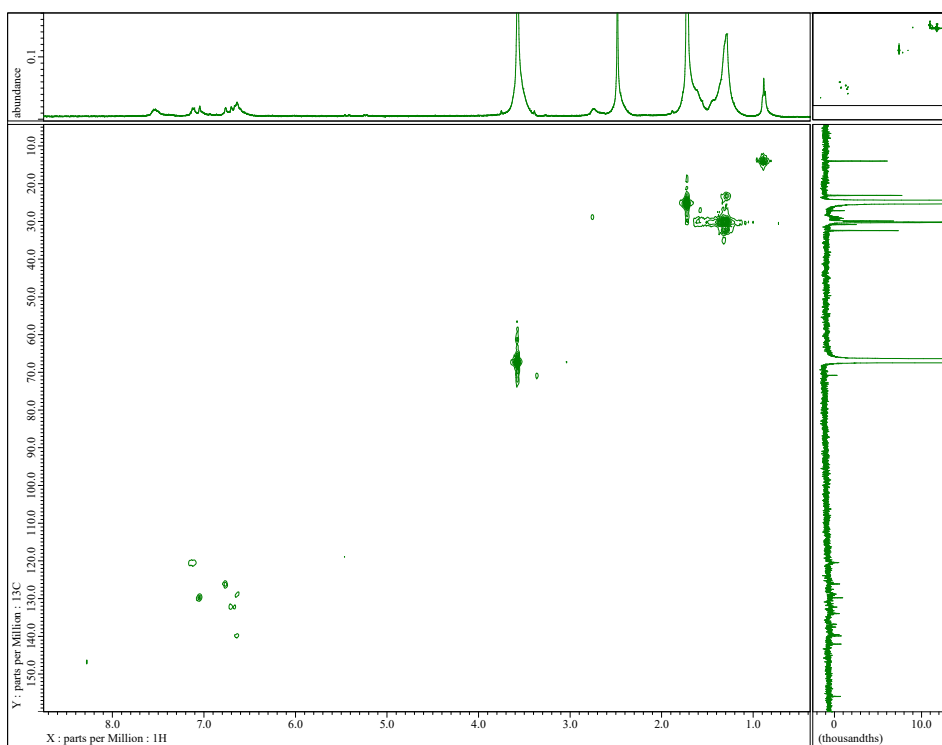

Figure S30.  $^{13}\text{C}$ - $^1\text{H}$  Correlation Spectrum of 4ab in  $\text{thf-d}_8$  (HMQC).

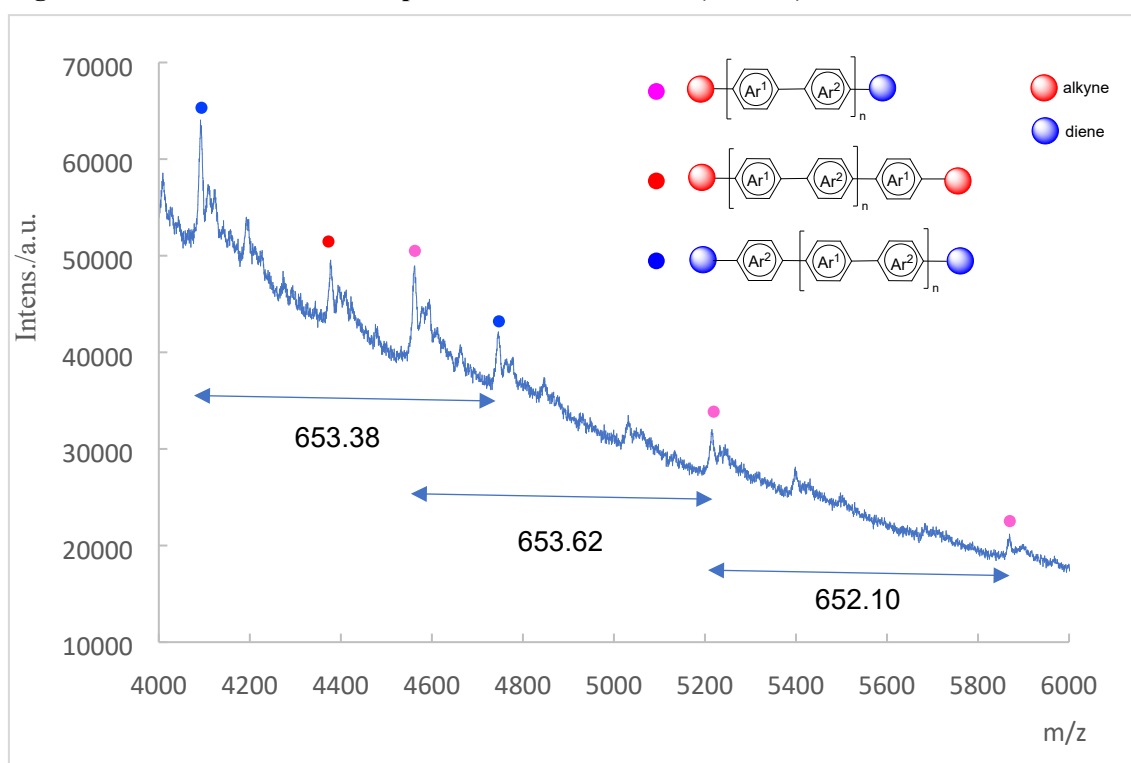

Figure S31. MALDI-TOF MS of 4ab. **Ar<sup>1</sup>: thienyl fragment. Ar<sup>2</sup>: pyridyl fragment. The conjugated trienyl fragments were omitted in the structure drawing.**



Chromatogram report

Header

|               |             |                                |                     |
|---------------|-------------|--------------------------------|---------------------|
| Title         |             | Data acquisition date and time | 2023/10/03 14:19:31 |
| Sample name   | <b>4ab</b>  | Calculation date and time      | 2023/10/03 14:30:43 |
| Database name | 2023-10.chd | Acquisition time [min]         | 4.000 - 11.900      |
| Data name     | RSLT0004    | Sampling interval [msec]       | 100                 |
| Method name   | 20231002STD | Cup number                     | 1                   |
| Channel       | RI          | Calculation type               | Molecular Weight    |

[mV]

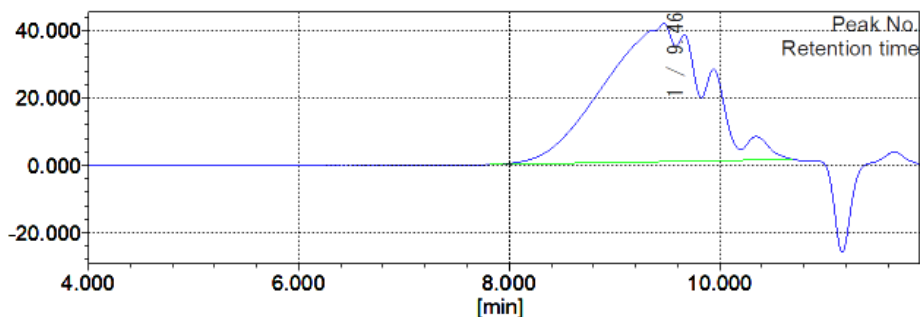

Result of molecular weight calculation (RI)

Peak 1 Base Peak

|               | [min]  | [mV]   | [mol]      | Mn    |       |
|---------------|--------|--------|------------|-------|-------|
| Peak start    | 7.820  | 0.273  | 96,070     | Mw    | 4,265 |
| Peak top      | 9.465  | 42.152 | 5,089      | Mw/Mn | 7,853 |
| Peak end      | 10.692 | 1.827  | 291        |       | 1,841 |
| Height [mV]   |        |        | 40.989     |       |       |
| Area [mV*sec] |        |        | 2757.692   |       |       |
| Area% [%]     |        |        | 100.000    |       |       |
| [eta]         |        |        | 7853.17956 |       |       |

Result of molecular weight calculation (RI)

Total

|               | [min]  | [mV]   | [mol]      | Mn    |       |
|---------------|--------|--------|------------|-------|-------|
| Peak start    | 7.820  | 0.273  | 96,070     | Mw    | 4,265 |
| Peak top      | 9.465  | 42.152 | 5,089      | Mw/Mn | 7,853 |
| Peak end      | 10.692 | 1.827  | 291        |       | 1,841 |
| Height [mV]   |        |        | 40.989     |       |       |
| Area [mV*sec] |        |        | 2757.692   |       |       |
| Area% [%]     |        |        | 100.000    |       |       |
| [eta]         |        |        | 7853.17956 |       |       |

**Figure S32. GPC Calculation result of 4ab.**

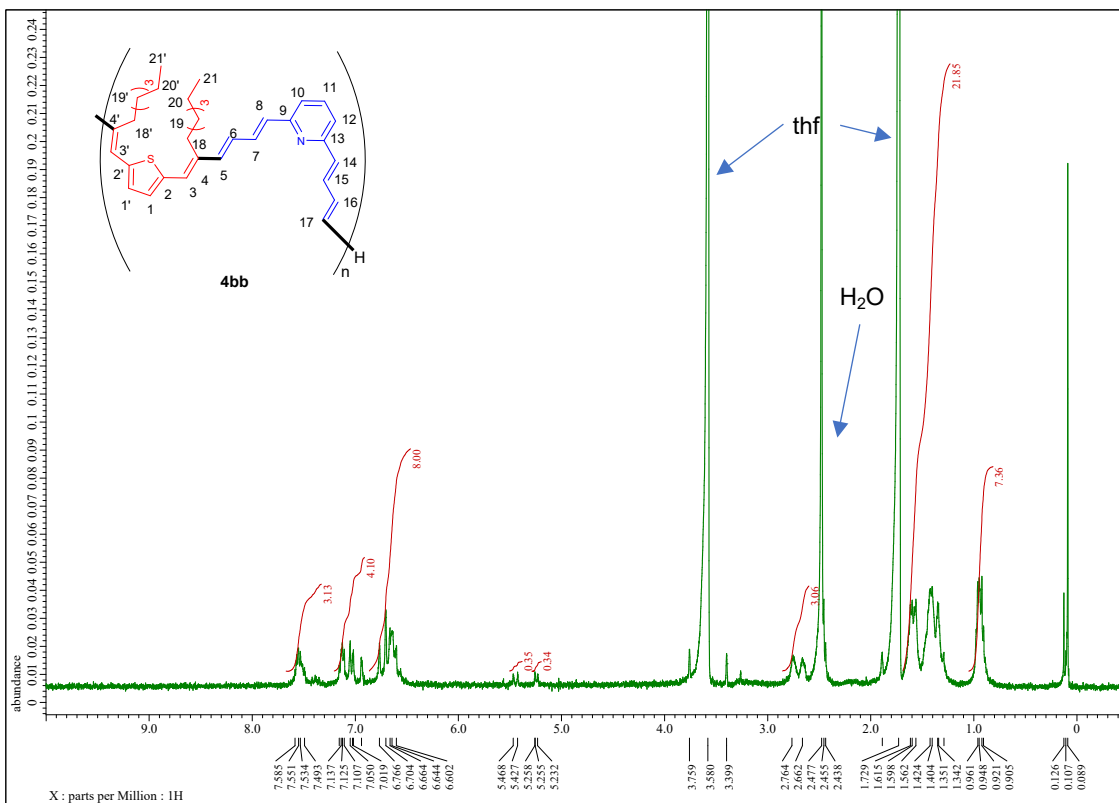

**Figure S33. <sup>1</sup>H NMR Spectrum of 4bb in thf-d<sub>8</sub>.**

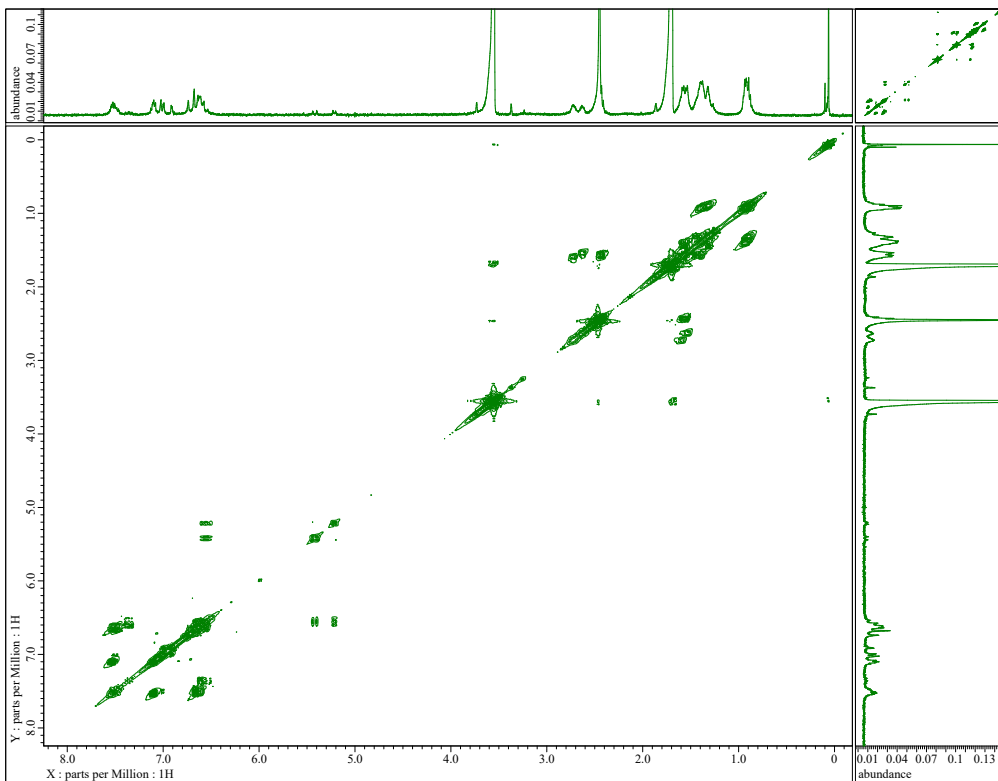

**Figure S34. <sup>1</sup>H-<sup>1</sup>H COSY NMR Spectrum of 4bb in thf-d<sub>8</sub>.**

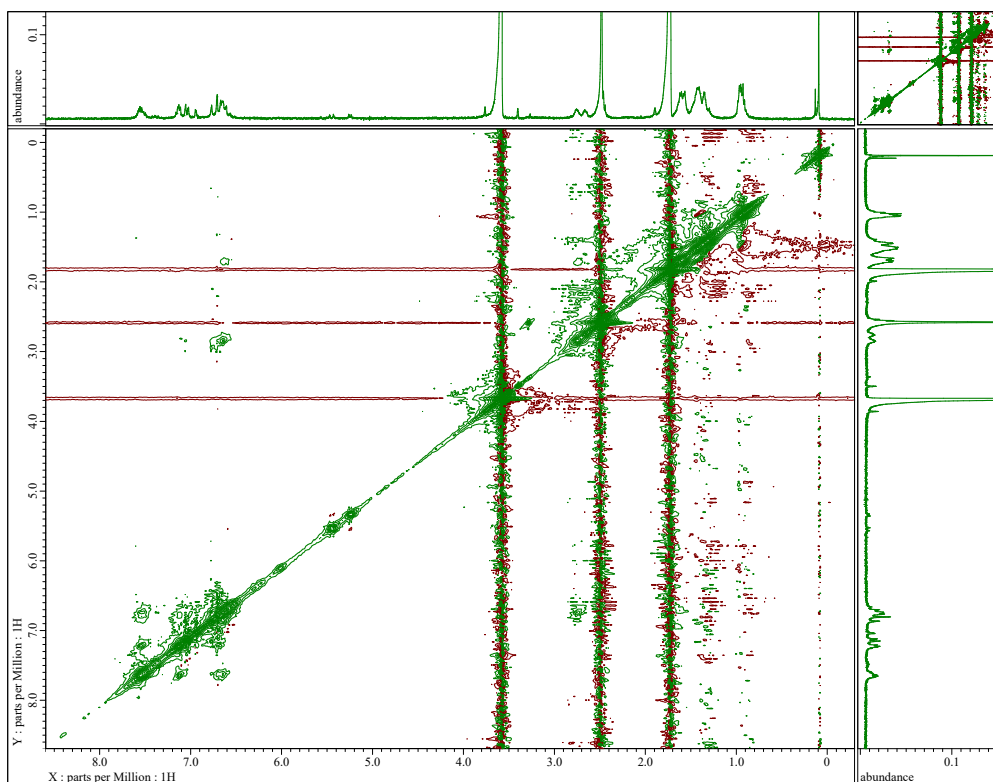

Figure S35.  $^1\text{H}$ - $^1\text{H}$  NOESY NMR Spectrum of 4bb in  $\text{thf-d}_8$ .

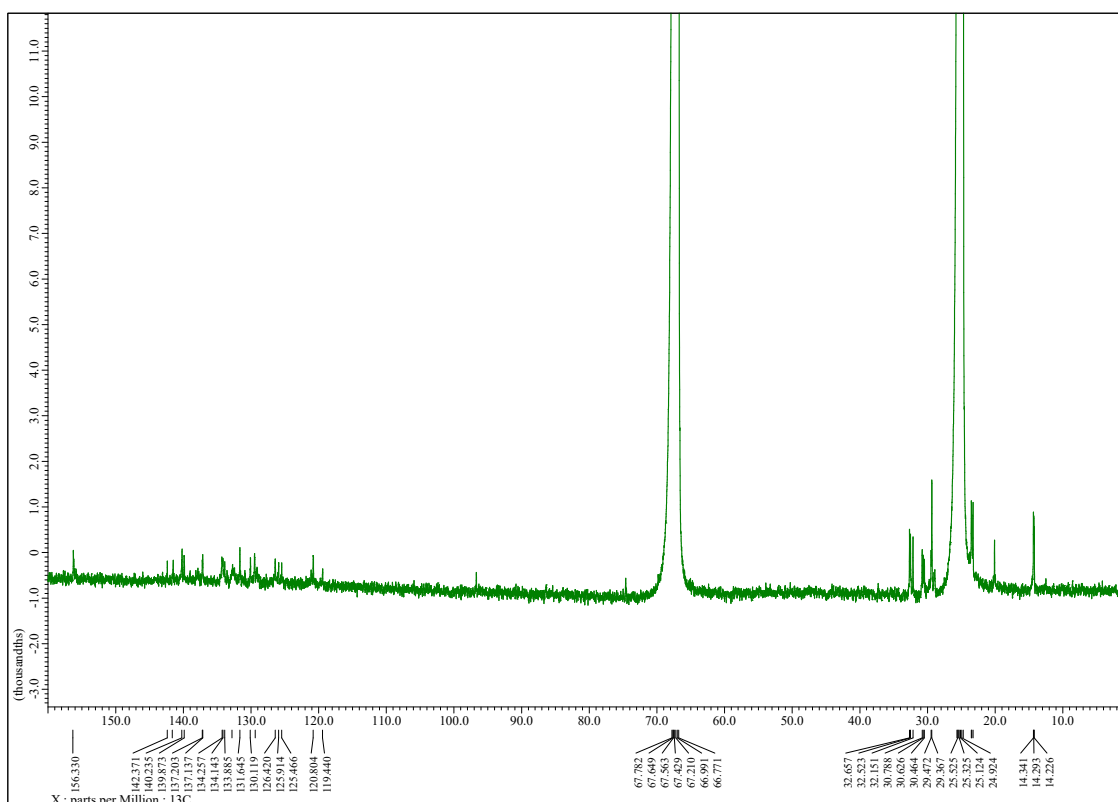

Figure S36.  $^{13}\text{C}\{^1\text{H}\}$  NMR Spectrum of 4bb in  $\text{thf-d}_8$ .

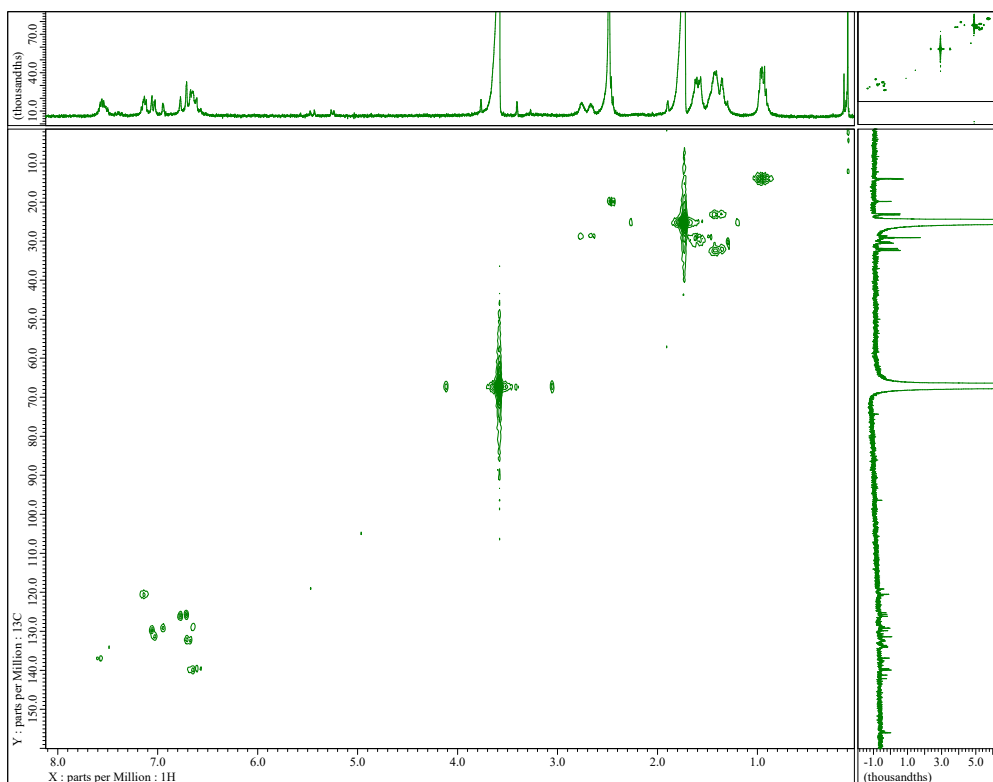

Figure S37.  $^{13}\text{C}$ - $^1\text{H}$  Correlation Spectrum of 4bb in  $\text{thf-d}_8$  (HMQC).

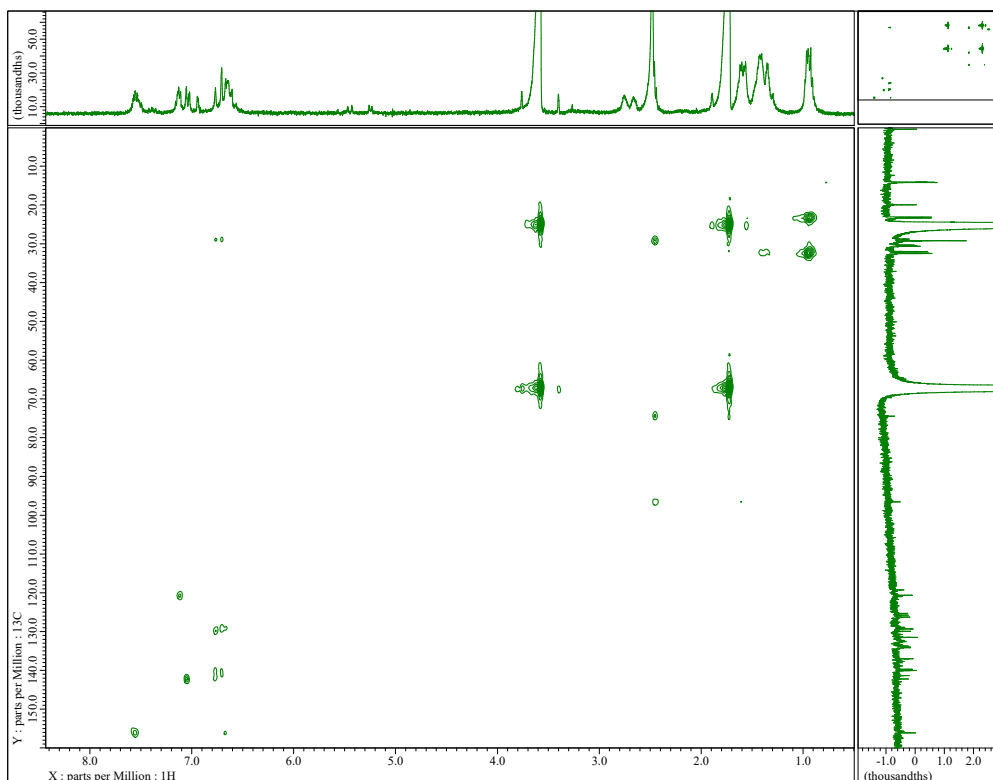

Figure S38.  $^{13}\text{C}$ - $^1\text{H}$  Correlation Spectrum of 4bb (HMBC).

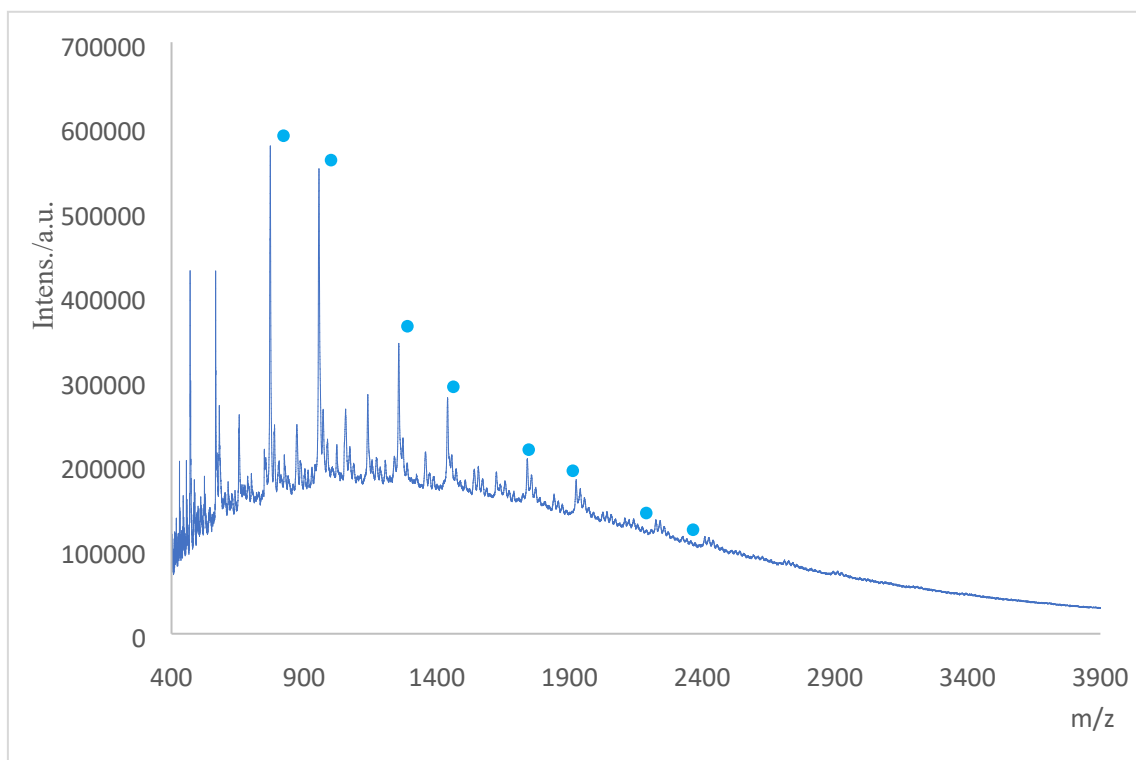

Figure S39. MALDI-TOF MS of 4bb.

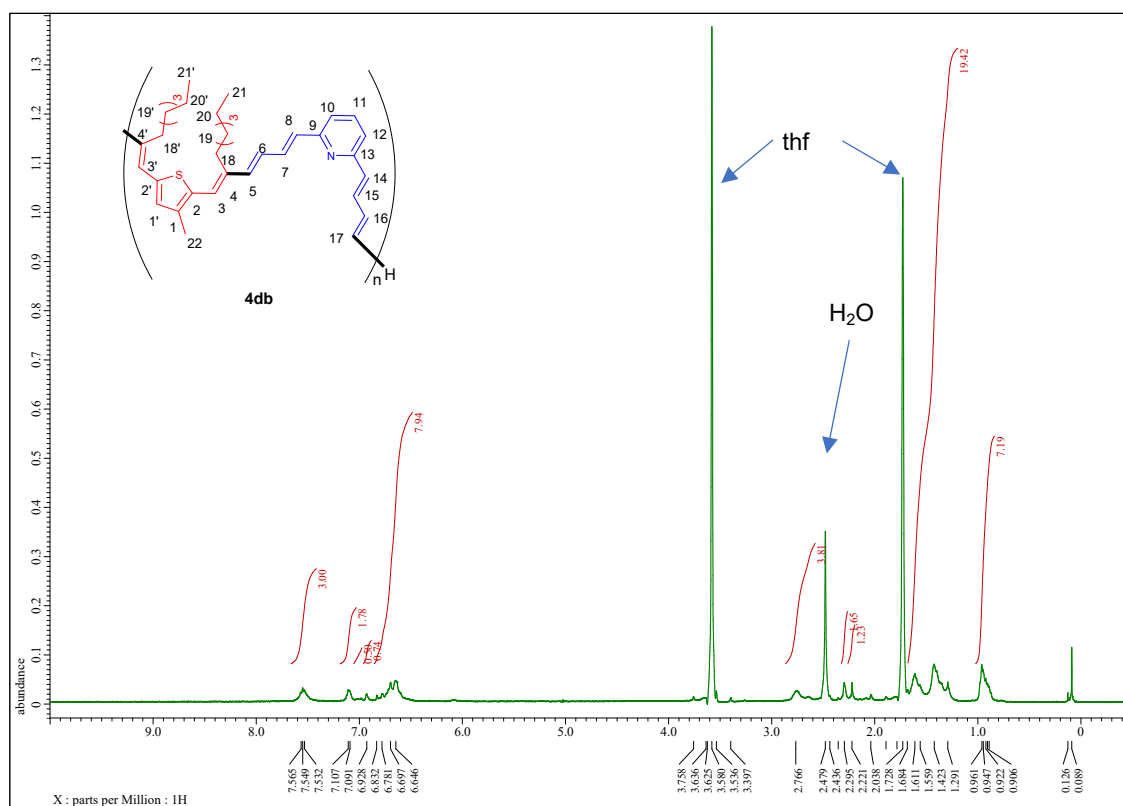

Figure S40.  $^1\text{H}$  NMR Spectrum of 4db in  $\text{thf-d}_8$ .

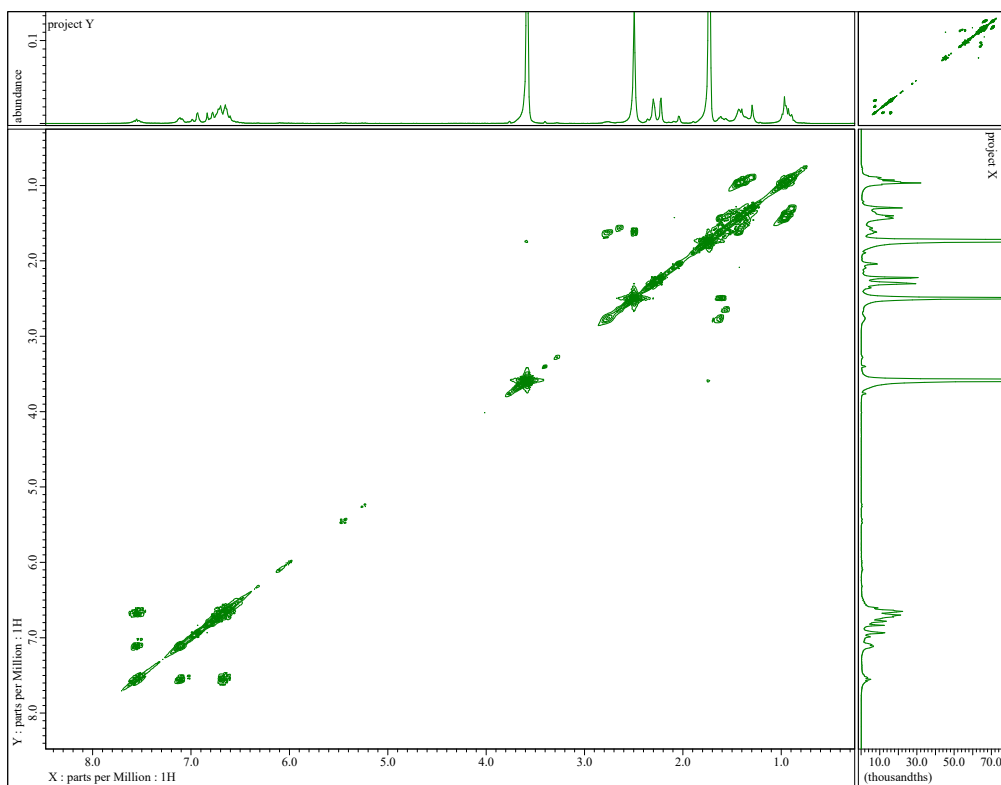

Figure S41.  $^1\text{H}$ - $^1\text{H}$  COSY NMR Spectrum of 4db in  $\text{thf-d}_8$ .

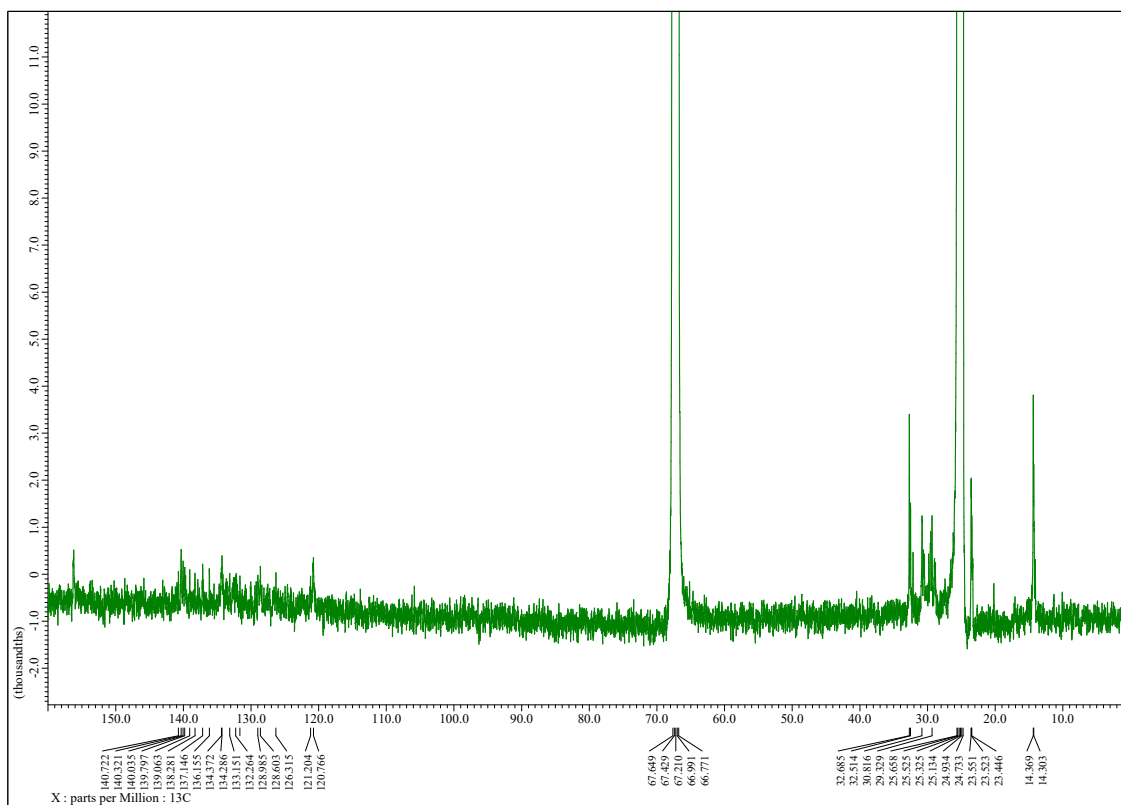

Figure S42.  $^{13}\text{C}\{^1\text{H}\}$  NMR Spectrum of 4db in  $\text{thf-d}_8$ .

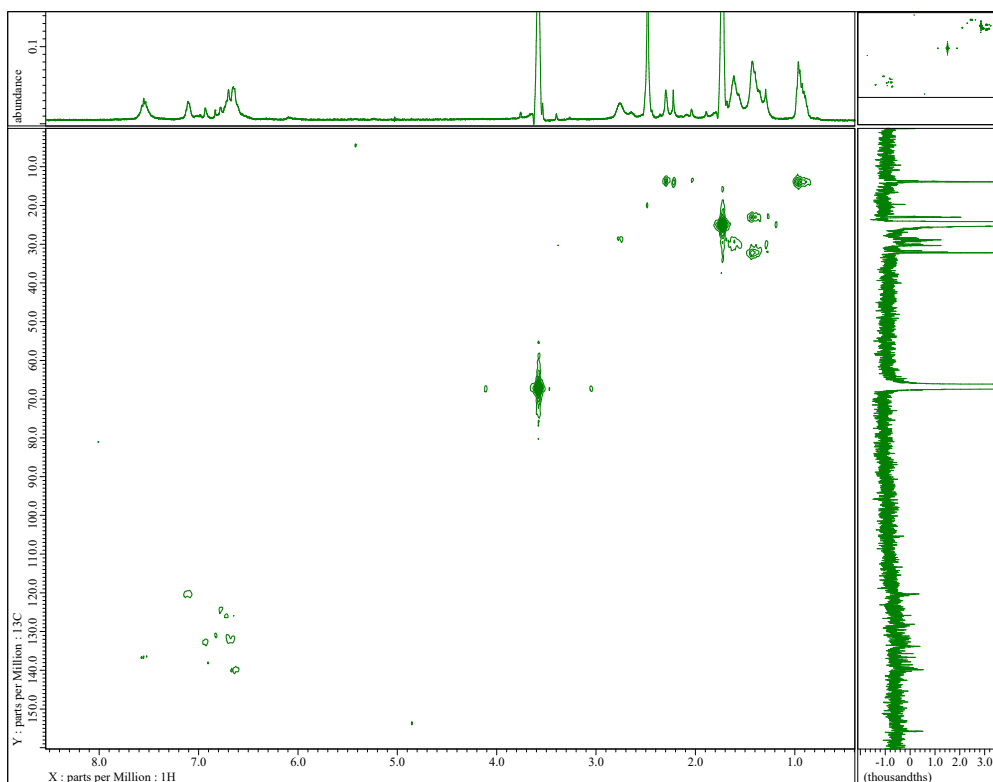

Figure S43.  $^{13}\text{C}$ - $^1\text{H}$  Correlation Spectrum of 4db in  $\text{thf-d}_8$  (HMQC).

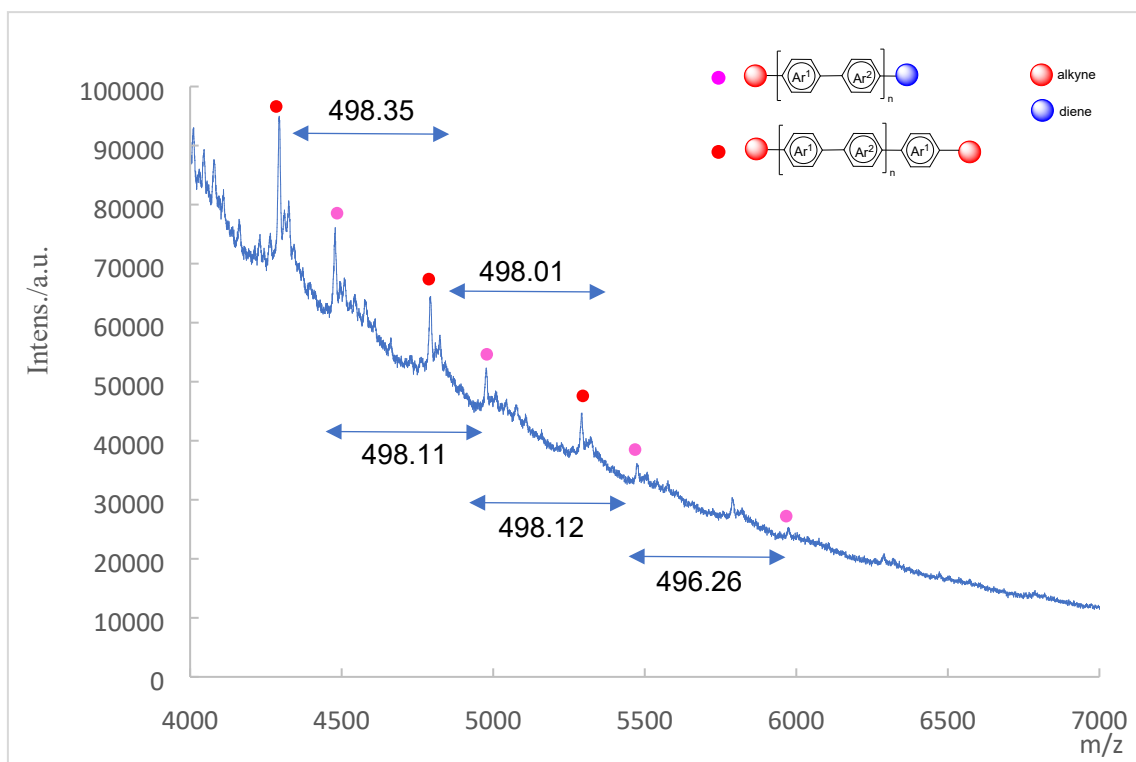

Figure S44. MALDI-TOF MS of 4db. **Ar<sup>1</sup>: thienyl fragment. Ar<sup>2</sup>: pyridyl fragment. The conjugated trienyl fragments were omitted in the structure drawing.**

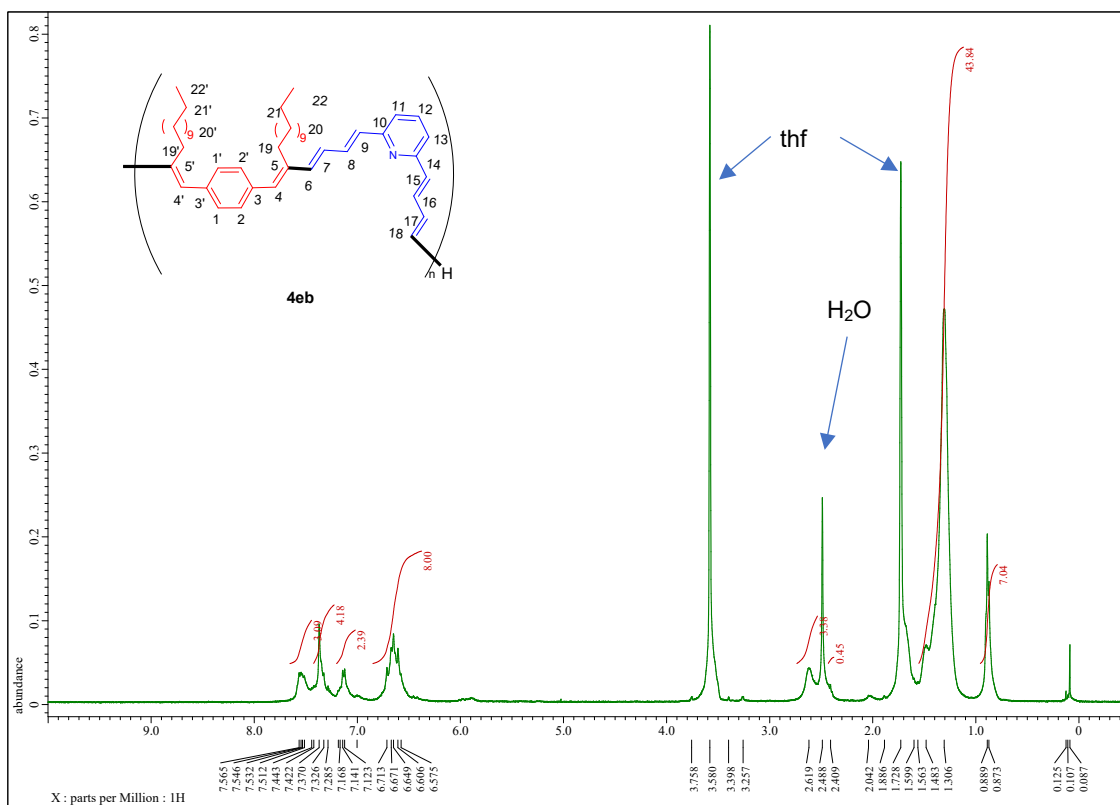

**Figure S45.  $^1\text{H}$  NMR Spectrum of 4eb in thf- $d_8$ .**

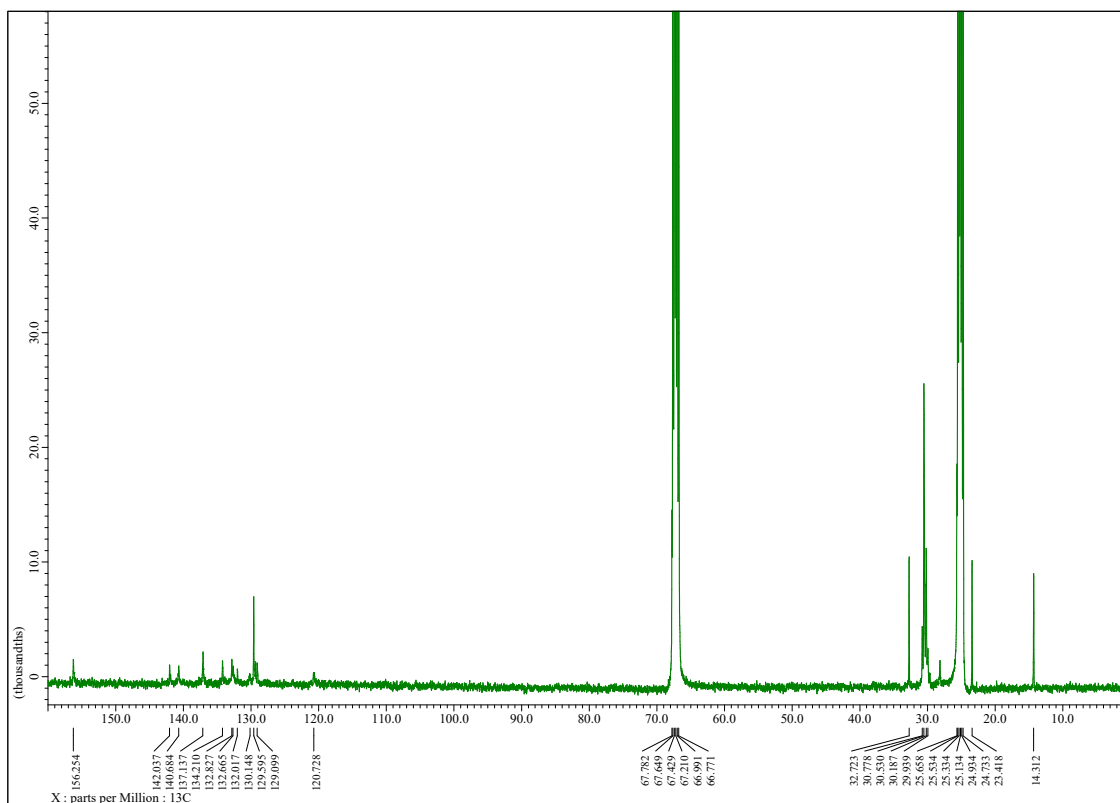

**Figure S46.  $^{13}\text{C}\{^1\text{H}\}$  NMR Spectrum of 4eb in thf- $d_8$ .**



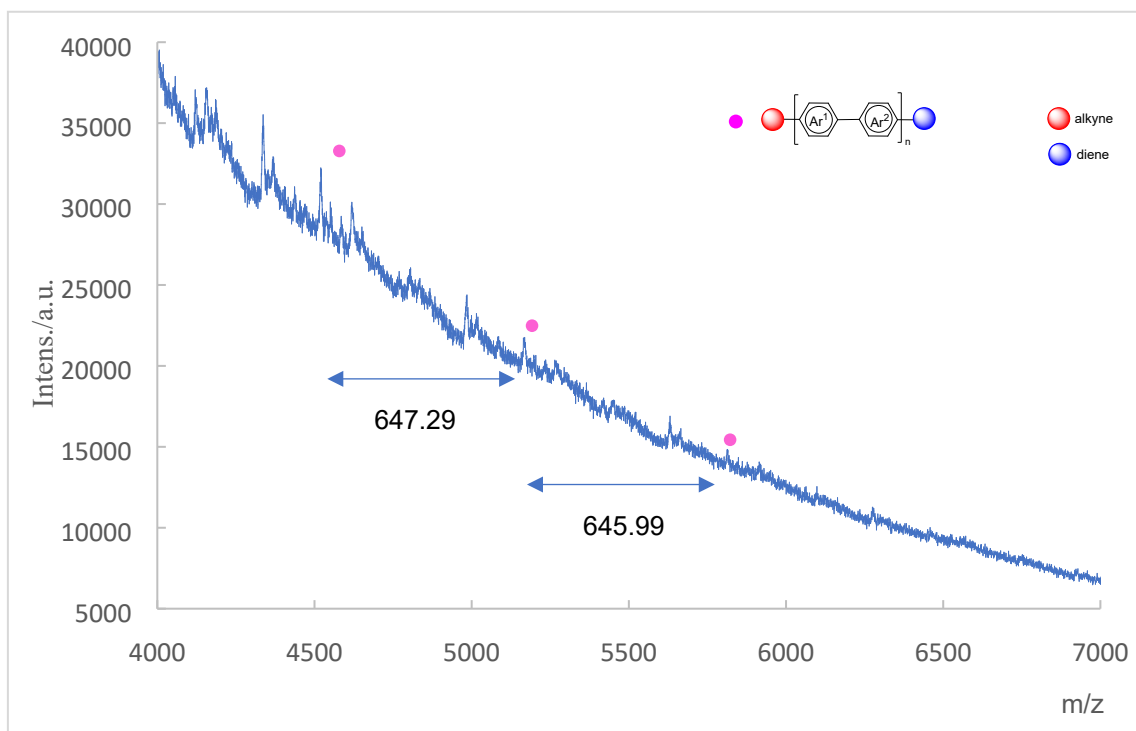

Figure S47. MALDI-TOF MS of 4b. **Ar<sup>1</sup>: thienyl fragment. Ar<sup>2</sup>: pyridyl fragment. The conjugated trienyl fragments were omitted in the structure drawing.**

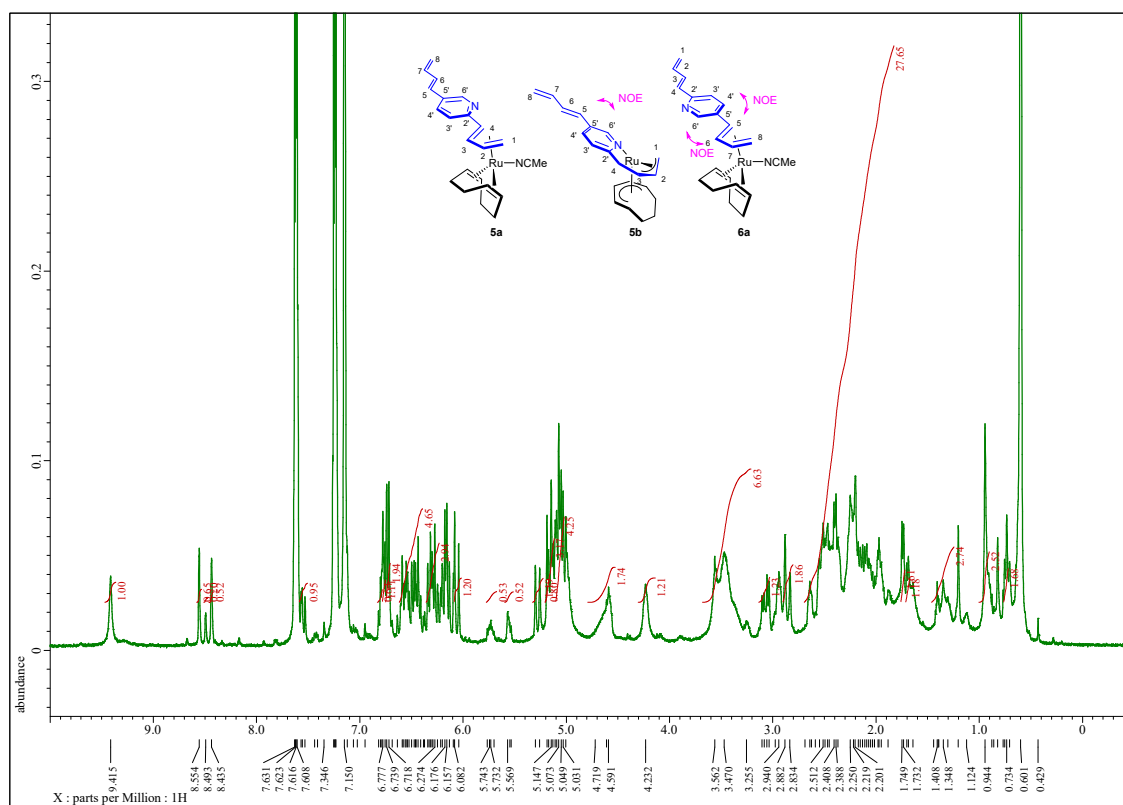

Figure S48. <sup>1</sup>H NMR Spectrum of reaction between 3a and 1a in C<sub>6</sub>D<sub>6</sub>.

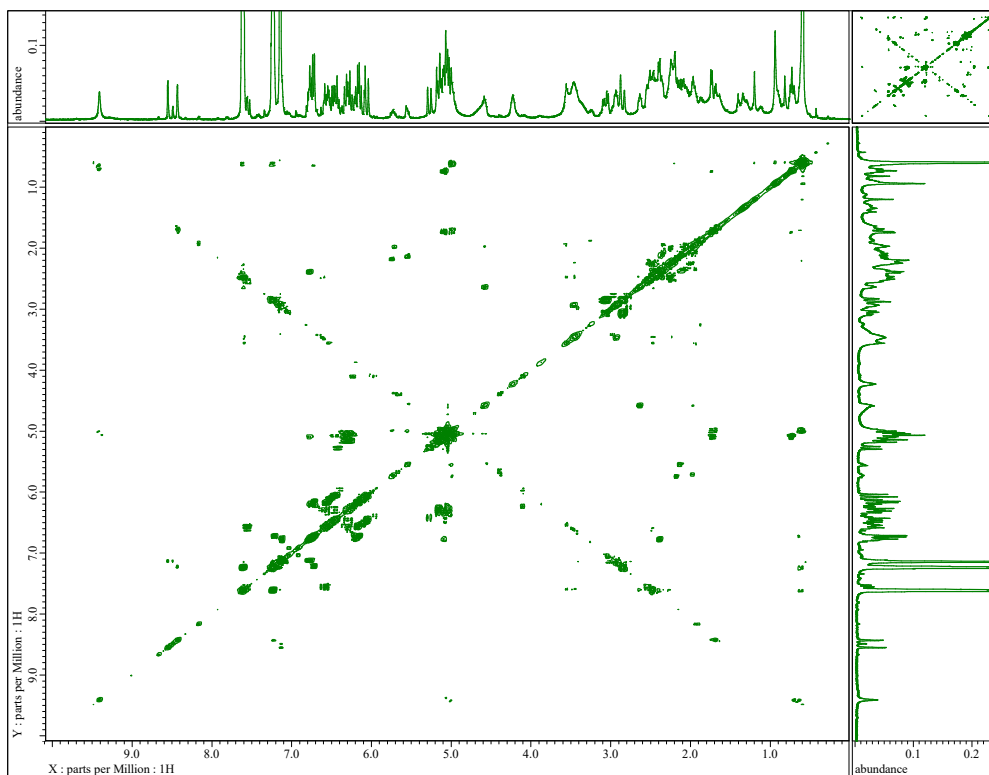

Figure S49.  $^1\text{H}$ - $^1\text{H}$  COSY NMR Spectrum of reaction between 3a and 1a in  $\text{C}_6\text{D}_6$ .

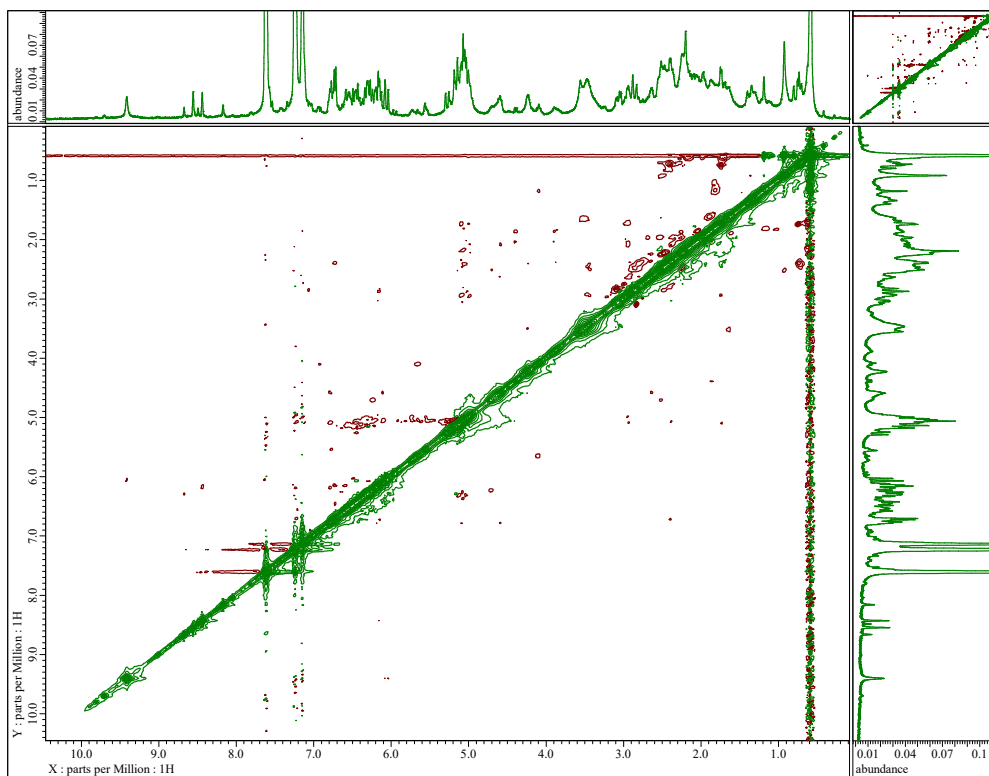

Figure S50.  $^1\text{H}$ - $^1\text{H}$  NOESY NMR Spectrum of reaction between 3a and 1a in  $\text{C}_6\text{D}_6$ .
